1  
2  
3  
4  
5  
6  
7  
8  
9  
10  
11  
12  
13  
14  
15  
16  
17  
18  
19  
20  
21  
22

**Preexisting heterogeneities in gene dosage sensitivity  
shaped sex chromosome evolution in mammals and birds**

Sahin Naqvi<sup>1,2</sup>, Daniel W. Bellott<sup>1</sup>, & David C. Page<sup>1,2,3</sup>

<sup>1</sup> Whitehead Institute, Cambridge MA 02142;

<sup>2</sup> Department of Biology, Massachusetts Institute of Technology, Cambridge MA 02139

<sup>3</sup> Howard Hughes Medical Institute, Whitehead Institute, Cambridge MA 02142

23 **Mammalian X and Y chromosomes evolved from an ordinary autosomal pair; genetic**  
24 **decay decimated the Y, which in turn necessitated X chromosome inactivation (XCI).**  
25 **Genes of the ancestral autosomes are often assumed to have undertaken these transitions**  
26 **on uniform terms, but we hypothesized that they varied in their dosage constraints. We**  
27 **inferred such constraints from conservation of microRNA (miRNA)-mediated repression,**  
28 **validated by analysis of experimental data. X-linked genes with a surviving Y homolog**  
29 **have the most conserved miRNA target sites, followed by genes with no Y homolog and**  
30 **subject to XCI, and then genes with no Y homolog but escaping XCI; this heterogeneity**  
31 **existed on the ancestral autosomes. Similar results for avian Z-linked genes, with or**  
32 **without a W homolog, lead to a model of XY/ZW evolution incorporating preexisting**  
33 **dosage sensitivities of individual genes in determining their evolutionary fates, and**  
34 **ultimately shaping the mammalian and avian sex chromosomes.**

35

## 36 **INTRODUCTION**

37 The mammalian X and Y chromosomes evolved from a pair of ordinary autosomes over the past  
38 300 million years (Lahn & Page, 1999). Only 3% of genes on the ancestral pair of autosomes  
39 survive on the human Y chromosome (Bellott et al., 2010; Skaletsky et al., 2003), compared to  
40 98% on the X chromosome (Mueller et al., 2013). In females, one copy of the X chromosome is  
41 silenced by X inactivation (XCI); this silencing evolved on a gene-by-gene basis following Y  
42 gene loss (Jegalian & Page, 1998; Ross et al., 2005), and some genes escape XCI in humans  
43 (Carrel & Willard, 2005) and other mammals (Yang, Babak, Shendure, & Disteche, 2010). In  
44 parallel, the avian Z and W sex chromosomes evolved from a different pair of autosomes than  
45 the mammalian X and Y chromosomes (Bellott et al., 2010; Nanda et al., 1999; Ross et al., 2005).

46 Decay of the female-specific W chromosome was similarly extensive, but birds did not evolve a  
47 large-scale inactivation of Z-linked genes analogous to XCI in mammals (Itoh et al., 2007; Mank  
48 & Ellegren, 2009; Uebbing et al., 2015; Wright, Zimmer, Harrison, & Mank, 2015). Thus, genes  
49 previously found on the ancestral autosomes that gave rise to the mammalian or avian sex  
50 chromosomes have undergone significant changes in gene dosage. In modern mammals, these  
51 molecular events have resulted in three classes of ancestral X-linked genes representing distinct  
52 evolutionary fates: those with a surviving Y homolog, those with no Y homolog and subject to  
53 XCI, and those with no Y homolog but escaping XCI. In birds, two classes of ancestral Z-linked  
54 genes have arisen: those with or without a W homolog.

55         These classes of ancestral X- or Z-linked genes are not differentiated in existing models  
56 of sex chromosome evolution. Specifically, mathematically framed models of sex chromosome  
57 evolution do not consider the possibility that ancestral genes may differ with respect to their  
58 likelihood of surviving on the sex-specific Y or W chromosomes, or of acquiring dosage  
59 compensation following Y or W gene decay (Mullon, Wright, Reuter, Pomiankowski, & Mank,  
60 2015). However, emerging evidence points towards critical heterogeneities in the properties of  
61 ancestral genes. For example, the trajectory of Y gene loss is consistent with exponential decay  
62 to a baseline level (Hughes et al., 2012), suggesting that mammalian Y chromosomes  
63 preferentially retained a subset of ancestral genes. Indeed, X- and Z-linked genes with surviving  
64 homologs on the mammalian Y or avian W chromosomes are enriched for important regulatory  
65 functions and predictors of haploinsufficiency compared to those lacking Y or W homologs  
66 (Bellott et al., 2014, 2017). These observations led us to ask whether the three classes of X-  
67 linked genes and the two classes of Z-linked genes show molecular signatures of dosage  
68 sensitivity that can be traced back to their ancestral, autosomal precursors.

69 Robust analyses of the selective pressures underlying either gene loss from the sex-  
70 specific chromosomes or the subsequent acquisition of XCI require precise delineation of the set  
71 of genes that were present on the ancestral autosomes. We took advantage of our previous  
72 reconstructions of the ancestral gene content of both the mammalian and avian sex chromosomes  
73 achieved through sequencing and bioinformatics approaches (Bellott et al., 2014, 2017, 2010;  
74 Hughes et al., 2012; Mueller et al., 2013). We reasoned that if X-linked genes, or Z-linked genes,  
75 differ in their dosage sensitivities, they also may differ in their regulatory states, with stronger  
76 purifying selection acting on regulatory elements associated with dosage-sensitive genes. We  
77 focused on microRNAs (miRNAs), small noncoding RNAs that frequently function as “tuners”  
78 of gene dosage by lowering target mRNA levels through pairing to the 3’ untranslated region  
79 (UTR) (Bartel, 2009). miRNA targets can be predicted genome-wide and followed through  
80 evolutionary time, enabling robust estimates of site-specific conservation (Friedman, Farh, Burge,  
81 & Bartel, 2009) and allowing us to reconstruct the regulatory states of the autosomal ancestors of  
82 current X- and Z-linked genes.

83 First, through genome-wide analysis of human copy number variation, we refined and  
84 validated a method for inferring dosage sensitivity based on patterns of conserved miRNA  
85 targeting. Using this tool, we inferred heterogeneities in dosage sensitivity between the three  
86 classes of X-linked genes and the two classes of Z-linked genes. We then demonstrated that these  
87 differences were likely to have been present on the ancestral autosomes that gave rise to the  
88 mammalian and avian sex chromosomes. Finally, we used publically available experimental  
89 datasets to validate the efficacy, in living cells, of the conserved miRNA targeting. These  
90 findings have important implications for our understanding of X and Z dosage compensation,  
91 and provide the foundation for a model of X-Y and Z-W evolution in which both survival on the

92 sex-specific Y or W chromosome and the subsequent evolution of XCI in mammals were  
93 determined by preexisting sensitivities to under- and overexpression.

94

## 95 **RESULTS**

### 96 **Analysis of human copy number variation indicates conserved microRNA targeting of** 97 **dosage-sensitive genes**

98 We first sought to determine whether conserved targeting by microRNAs (miRNAs) correlates  
99 with dosage sensitivity across the human genome. To estimate pressure to maintain miRNA  
100 targeting, we used published probabilities of conserved targeting ( $P_{CT}$  scores) for each gene-  
101 miRNA interaction in the human genome. Since the  $P_{CT}$  score intrinsically controls for  
102 differences in the background conservation and sequence composition of individual 3'UTRs, it is  
103 comparable across both genes and miRNA families (Friedman et al., 2009). We refer to these  
104  $P_{CT}$  scores as “miRNA conservation scores” in the remainder of the text.

105 Genes for which increases in dosage are deleterious should be depleted from the set of  
106 observed gene duplications in healthy human individuals. We used a catalogue of rare genic  
107 copy number variation among 59,898 control human exomes (Exome Aggregation Consortium,  
108 ExAC)(Ruderfer et al., 2016) to classify autosomal protein-coding genes as exhibiting or lacking  
109 duplication or deletion in healthy individuals (see Methods). We compared duplicated and non-  
110 duplicated genes with the same deletion status in order to control for differences in sensitivity to  
111 underexpression. We found that non-duplicated genes have significantly higher miRNA  
112 conservation scores than duplicated genes, irrespective of deletion status (Figure 1A,B). Non-  
113 deleted genes also have significantly higher scores than deleted genes irrespective of duplication  
114 status (Figure 1 – figure supplement 1), but duplication status has a greater effect on miRNA

115 conservation scores than does deletion status (Figure 1 – figure supplement 2). Thus, conserved  
116 miRNA targeting is a feature of genes sensitive to changes in gene dosage in humans and is  
117 especially informative with regards to sensitivity to overexpression.

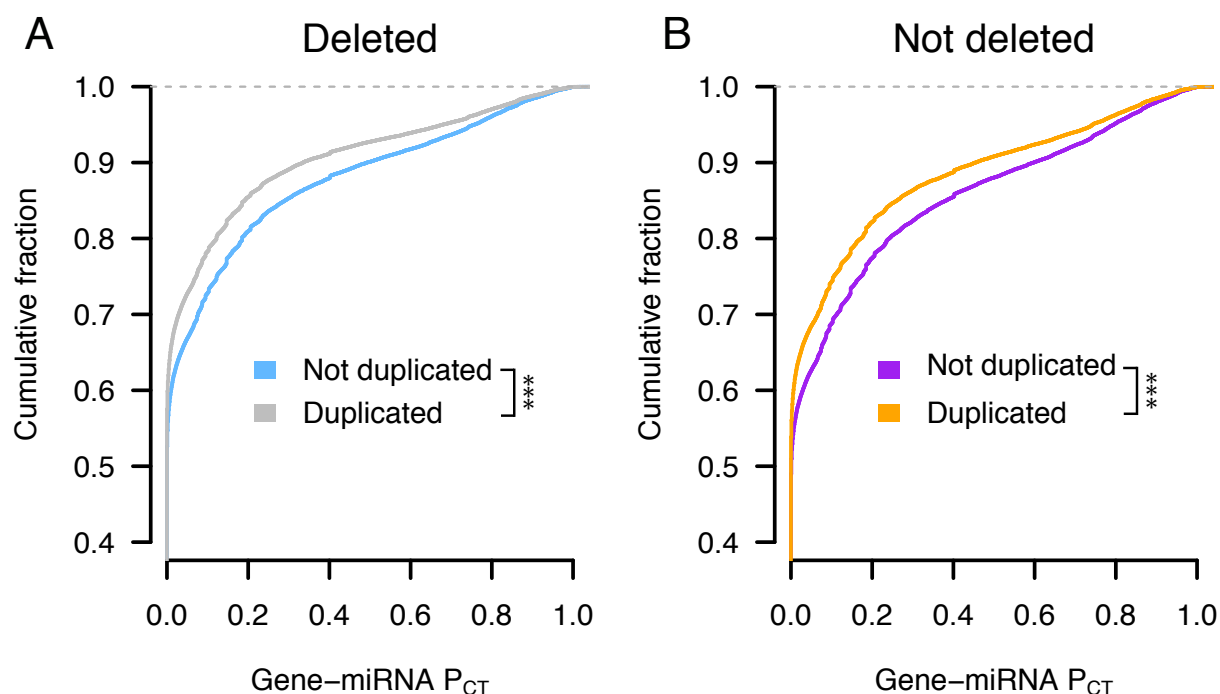

118  
119  
120 **Figure 1: Conserved miRNA targeting of autosomal genes stratified by copy number**  
121 **variation in 59,898 human exomes.** Probabilities of conserved targeting ( $P_{CT}$ ) of all gene-  
122 miRNA interactions involving non-duplicated and duplicated genes, further stratified as (A)  
123 deleted (blue,  $n = 80,290$  interactions from 3,976 genes; grey,  $n = 69,339$  interactions from 4,118  
124 genes) or (B) not deleted (purple,  $n = 72,826$  interactions from 3,510 genes; orange,  $n = 51,514$   
125 interactions from 2,916 genes). \*\*\*  $p < 0.001$ , two-sided Kolmogorov-Smirnov test.

126  
127  
128  
129  
130 **X-Y pairs and X-inactivated genes have higher miRNA conservation scores than X escape**  
131 **genes**

132 We next assessed whether the three classes of X-linked genes differ with respect to dosage  
133 sensitivity as inferred by conserved miRNA targeting. To delineate these classes, we began with  
134 the set of ancestral genes reconstructed through cross-species comparisons of the human X

135 chromosome and orthologous chicken autosomes (Bellott et al., 2014, 2017, 2010; Hughes et al.,  
136 2012; Mueller et al., 2013). We designated ancestral X-linked genes with a surviving human Y  
137 homolog (Skaletsky et al., 2003) as X-Y pairs and also considered the set of X-linked genes with  
138 a surviving Y homolog in any of eight mammals (Bellott et al., 2014) to increase the  
139 phylogenetic breadth of findings regarding X-Y pairs. A number of studies have catalogued the  
140 inactivation status of X-linked genes in various human tissues and cell-types. We used a meta-  
141 analysis that combined results from three studies by assigning a “consensus” X-inactivation  
142 status to each gene (Balaton, Cotton, & Brown, 2015) to designate the remainder of ancestral  
143 genes lacking a Y homolog as subject to or escaping XCI. In summary, we classified genes as  
144 either: 1) X-Y pairs, 2) lacking a Y homolog and subject to XCI (X-inactivated), or 3) lacking a  
145 Y homolog but escaping XCI (X escape).

146 We found that human X-Y pairs have the highest miRNA conservation scores, followed  
147 by X-inactivated and finally X escape genes (Figure 2A). The expanded set of X-Y pairs across  
148 eight mammals also has significantly higher miRNA conservation scores than ancestral X-linked  
149 genes with no Y homolog (Figure 2B). Observed differences between miRNA conservation  
150 scores are not driven by distinct subsets of genes in each class, as indicated by gene resampling  
151 with replacement (Figure 2 – figure supplement 1), and are not accounted for by differences in  
152 haploinsufficiency, as indicated by comparisons of gene subsets matched by published estimates  
153 of haploinsufficiency probabilities (Huang, Lee, Marcotte, & Hurles, 2010) (Figure 2 – figure  
154 supplement 2). Furthermore, the decrease in miRNA conservation scores of X escape genes  
155 relative to X-inactivated genes and X-Y pairs is not driven by genes that escape variably across  
156 individuals (Figure 2 – figure supplement 3). Together, these results indicate heterogeneity in  
157 sensitivity to both under- and overexpression among the three classes of ancestral X-linked

158 genes: X-Y pairs are the most dosage-sensitive, while X-inactivated genes are of intermediate  
159 dosage sensitivity, and X escape genes are the least dosage-sensitive.

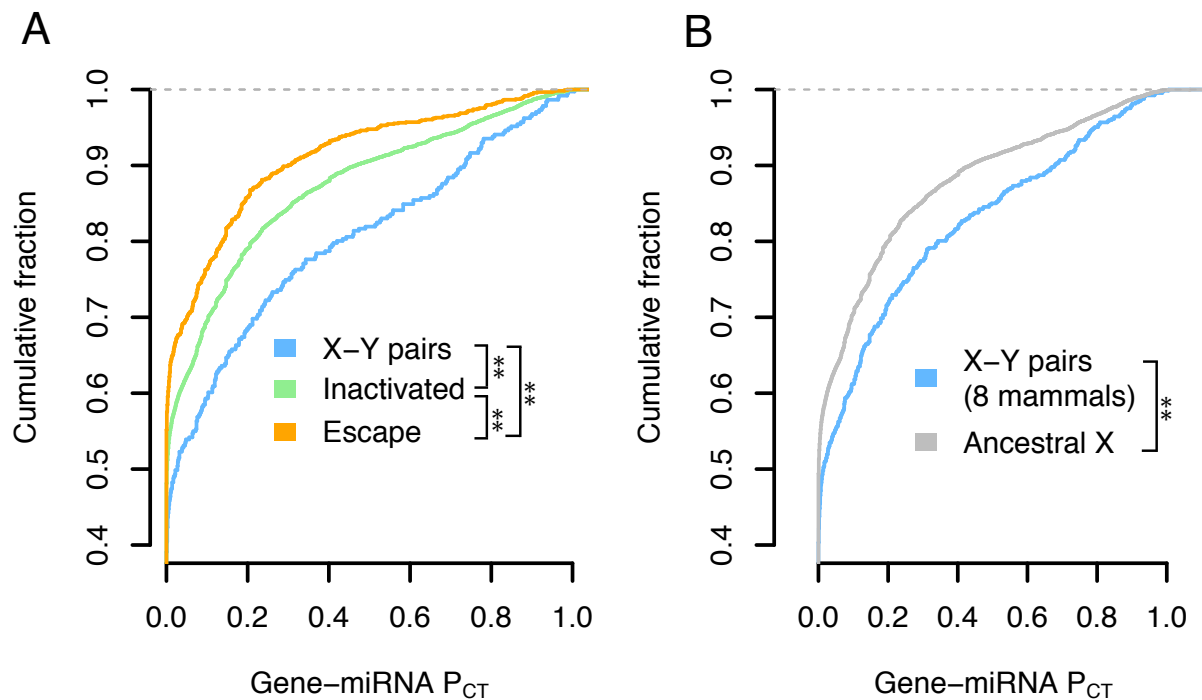

160

161 **Figure 2. X-Y pairs and X-inactivated genes have higher miRNA conservation scores than**  
162 **X escape genes.** a)  $P_{CT}$  score distributions of all gene-miRNA interactions involving (A) human  
163 X-Y pairs ( $n = 371$  interactions from 15 genes), X-inactivated genes ( $n = 6,743$  interactions from  
164 329 genes), and X escape genes ( $n = 1,037$  interactions from 56 genes), or (B) X-Y pairs across  
165 eight sequenced mammalian Y chromosomes ( $n = 647$  interactions from 32 genes) and other  
166 ancestral X genes ( $n = 8,831$  interactions from 457 genes). \*\*  $p < 0.01$ , two-sided Kolmogorov-  
167 Smirnov test.

168

169

170

171 **Patterns of X-linked miRNA targeting were present on the ancestral autosomes**

172 We next asked whether the differences in miRNA targeting for the three classes of X-linked

173 genes were present on the ancestral autosomes that gave rise to the mammalian X and Y

174 chromosomes. We focused on miRNA target sites in the 3' UTR of human orthologs that align

175 with perfect identity to a site in the chicken genome; these sites were likely present in the

176 common ancestor of mammals and birds and thus likely present on the ancestral autosomes. We



177 found that X-Y pairs have the highest fraction of genes with at least one human-chicken-  
178 conserved target site, followed by X-inactivated genes, and then X escape genes, with similar  
179 results for the expanded set of X-Y pairs across 8 mammals (Figure 3A,B). We observed the  
180 same pattern after accounting for the background conservation of each individual 3' UTR (see  
181 Methods) (Figure 3 – figure supplement 1). These results indicate that the autosomal precursors  
182 of X-Y pairs and X-inactivated genes were more dosage-sensitive than those of X escape genes;  
183 present-day heterogeneities in dosage sensitivity on the mammalian X chromosome were present  
184 on the ancestral autosomes from which it derived.  
185

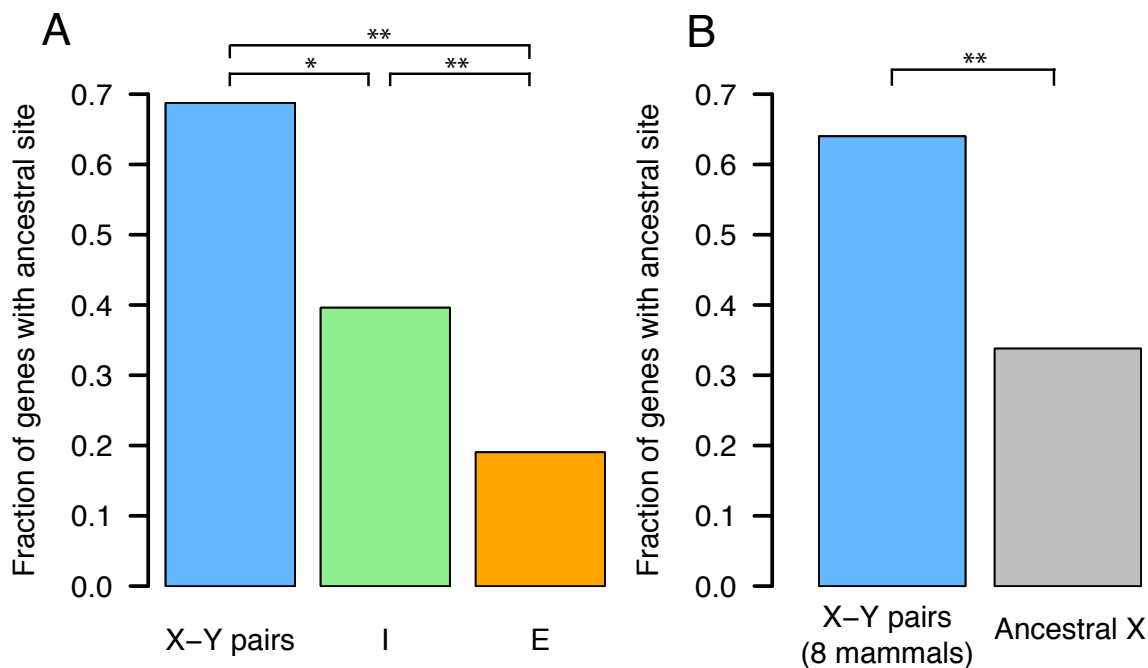

186  
187 **Figure 3. Patterns of X-linked miRNA targeting were present on the ancestral autosomes.**  
188 Each bar represents the fraction of genes with at least one miRNA target site found in the 3'  
189 UTR of both human and chicken orthologs. (A) Human X-Y pairs (n = 16), X-inactivated genes  
190 (n = 251), and X escape genes (n = 42). (B) X-Y pairs across eight sequenced mammalian Y  
191 chromosomes (n = 25) and other ancestral X genes (n = 351). \* p < 0.05, \*\* p < 0.01, two-sided  
192 Fisher's exact test.

193  
194  
195

196 **Z-W pairs have higher miRNA conservation scores than other ancestral Z-linked genes**

197 We recently showed that avian Z-linked genes with surviving homologs on the female-specific  
198 W chromosome (Z-W pairs) are enriched for predictors of haploinsufficiency relative to those  
199 lacking a W homolog, indicating sensitivity to underexpression (Bellott et al., 2017). Our  
200 analyses of X-linked miRNA targeting presented here document heterogeneities in sensitivity to  
201 both under- and overexpression; we therefore assessed whether Z-W pairs are similarly sensitive  
202 to both increases and decreases in gene dosage. We used the set of ancestral genes reconstructed  
203 through cross-species comparisons of the avian Z chromosome and orthologous human  
204 autosomes and focused on the set of Z-W pairs identified by sequencing of the chicken W  
205 chromosome (Bellott et al., 2017, 2010). To increase the phylogenetic breadth of our  
206 comparisons, we also included candidate Z-W pairs obtained through comparisons of male and  
207 female genome assemblies (4 species set) or inferred by read-depth changes in female genome  
208 assemblies (14 species set, see Methods for details) (Zhou et al., 2014). Since the more complete  
209 3'UTR annotations in the human genome relative to chicken allow for a more accurate  
210 assessment of conserved miRNA targeting, we analyzed the 3' UTRs of the human orthologs of  
211 chicken Z-linked genes, reasoning that important properties of chicken Z-linked genes should be  
212 retained by their human autosomal orthologs.

213 We found that the human orthologs of Z-W pairs have higher miRNA conservation  
214 scores than the human orthologs of other ancestral Z genes (Figure 3A). Differences in miRNA  
215 conservation scores between Z-W pairs and other ancestral Z genes remained significant when  
216 considering the expanded sets of Z-W pairs across four and 14 avian species (Figure 3B,C).  
217 These differences are not driven by distinct subsets of genes (Figure 4 – figure supplement 1)  
218 and are not accounted for by haploinsufficiency probability (Figure 4 – figure supplement 2). We

219 infer that Z-linked genes with a surviving W homolog are more sensitive to changes in dosage --  
220 both increases and decreases -- than are genes without a surviving W homolog.  
221

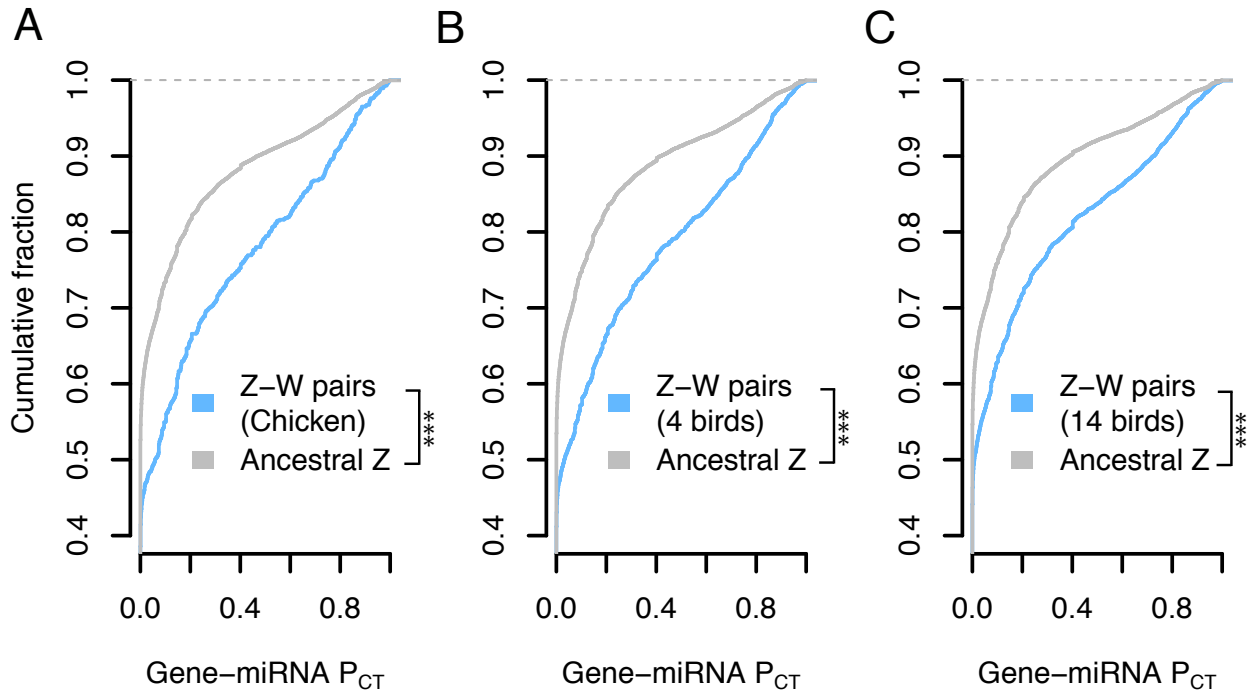

222  
223 **Figure 4. Z-W pairs have higher miRNA conservation scores than other ancestral Z-linked**  
224 **genes.**  $P_{CT}$  score distributions of all gene-miRNA interactions involving the human orthologs of  
225 (A) chicken Z-W pairs ( $n = 832$  interactions from 28 genes) and other ancestral Z genes ( $n =$   
226  $16,692$  interactions from 657 genes), (B) Z-W pairs including predictions from three additional  
227 birds with male and female genome sequence ( $n = 2,187$  interactions from 78 genes) and other  
228 ancestral Z genes ( $n = 15,357$  interactions from 607 genes), or (C) Z-W pairs including read  
229 depth-based predictions from 10 additional birds with only female genome sequence ( $n = 4,458$   
230 interactions from 157 genes) and other ancestral Z genes ( $n = 13,086$  interactions from 528  
231 genes). \*\*\*  $p < 0.001$ , two-sided Kolmogorov-Smirnov test.

232  
233  
234  
235 **Patterns of Z-linked miRNA targeting were present on the ancestral autosomes**

236 We next asked whether the differences in miRNA targeting between Z-W pairs and other  
237 ancestral Z-linked genes were present on the ancestral autosomes that gave rise to the avian Z  
238 and W chromosomes. We found that both chicken Z-W pairs and the predicted 4- and 14-species

239 sets of Z-W pairs are enriched for human-chicken-conserved miRNA target sites relative to their  
240 Z-linked counterparts without surviving W homologs (Figure 5A–C), even when accounting for  
241 the background conservation of each individual 3' UTR (Figure 5 – figure supplement 1). Thus,  
242 the autosomal precursors of avian Z-W pairs were more dosage-sensitive than the autosomal  
243 precursors of Z-linked genes that lack a W homolog.  
244

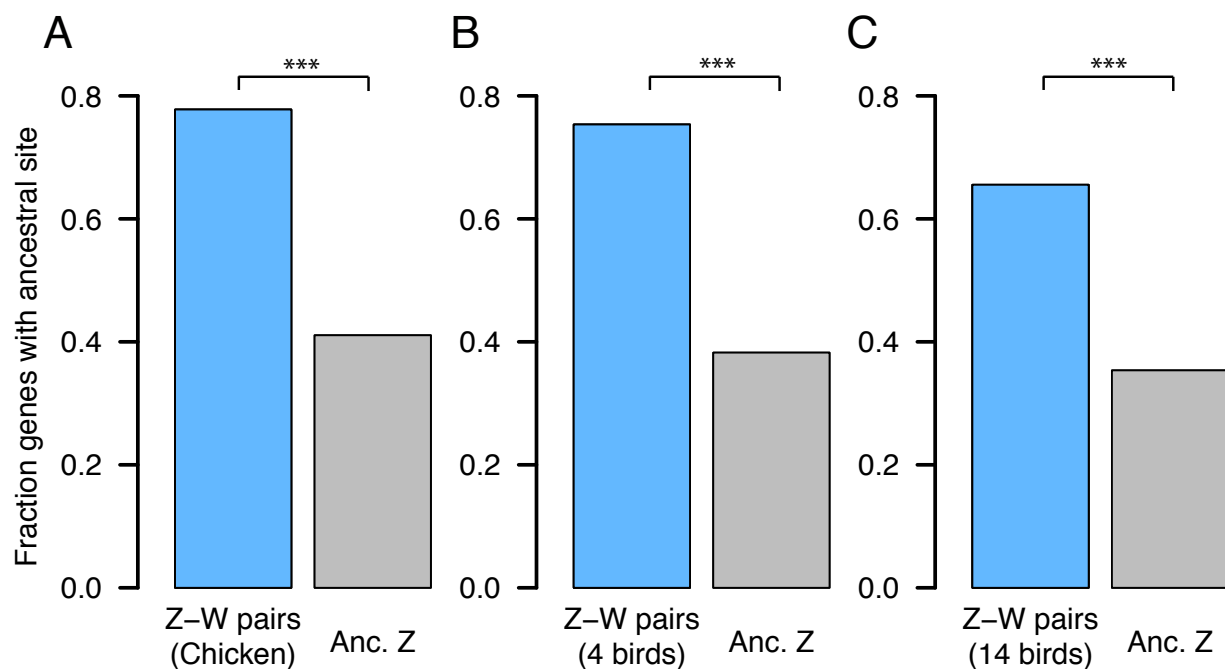

245 **Figure 5. Patterns of Z-linked miRNA targeting were present on the ancestral autosomes.**  
246 Each bar represents the fraction of genes with at least one miRNA target site found in the 3'  
247 UTR of both human and chicken orthologs. (A) Chicken Z-W pairs (n = 27) and other ancestral  
248 Z genes (n = 578). (B) Z-W pairs including predictions from three additional birds with male and  
249 female genome sequence (n = 73) and other ancestral Z genes (n = 532). (C) Z-W pairs including  
250 read depth-based predictions from 10 additional birds with only female genome sequence (n =  
251 147) and other ancestral Z genes (n = 458). \* p < 0.05, \*\* p < 0.01, two-sided Fisher's exact test.  
252  
253

#### 254 **Analyses of experimental datasets validate miRNA target site efficacy**

255 Our results to this point, which indicate heterogeneities in dosage constraints among X- or Z-  
256 linked genes as inferred by predicted miRNA target sites, lead to predictions regarding the

257 efficacy of these sites in vivo. To test these predictions, we turned to publically available  
258 experimental datasets consisting both of gene expression profiling following transfection or  
259 knockout of individual miRNAs, and of high-throughput crosslinking-immunoprecipitation  
260 (CLIP) to identify sites that bind Argonaute in vivo (see Methods). If the above-studied sites are  
261 effective in mediating target repression, targets of an individual miRNA should show increased  
262 (decreased) expression levels or Argonaute binding following miRNA transfection (knockout).  
263 Together, our analyses of publically available datasets fulfilled these predictions, validating the  
264 efficacy of sites targeting ancestral X-linked genes and the autosomal orthologs of ancestral Z-  
265 linked genes in multiple cellular contexts and species (Figure 6). From the gene expression  
266 profiling data, we observed results consistent with effective targeting by a) ten different miRNA  
267 families in human HeLa cells (Figure 6 – figure supplement 1), b) four different miRNAs in  
268 human HCT116 and HEK293 cells (Figure 6 – figure supplement 2), and c) miR-155 in mouse B  
269 and Th1 cells (Figure 6 – figure supplement 3). In the CLIP data, the human orthologs of X- or  
270 Z-linked targets of miR-124 are enriched for Argonaute-bound clusters that appear following  
271 miR-124 transfection, while a similar but non-significant enrichment is observed for miR-7  
272 (Figure 6 – figure supplement 4). Thus, conserved miRNA target sites used to infer dosage  
273 constraints on X-linked genes and the autosomal orthologs of Z-linked genes can effectively  
274 mediate target repression.  
275

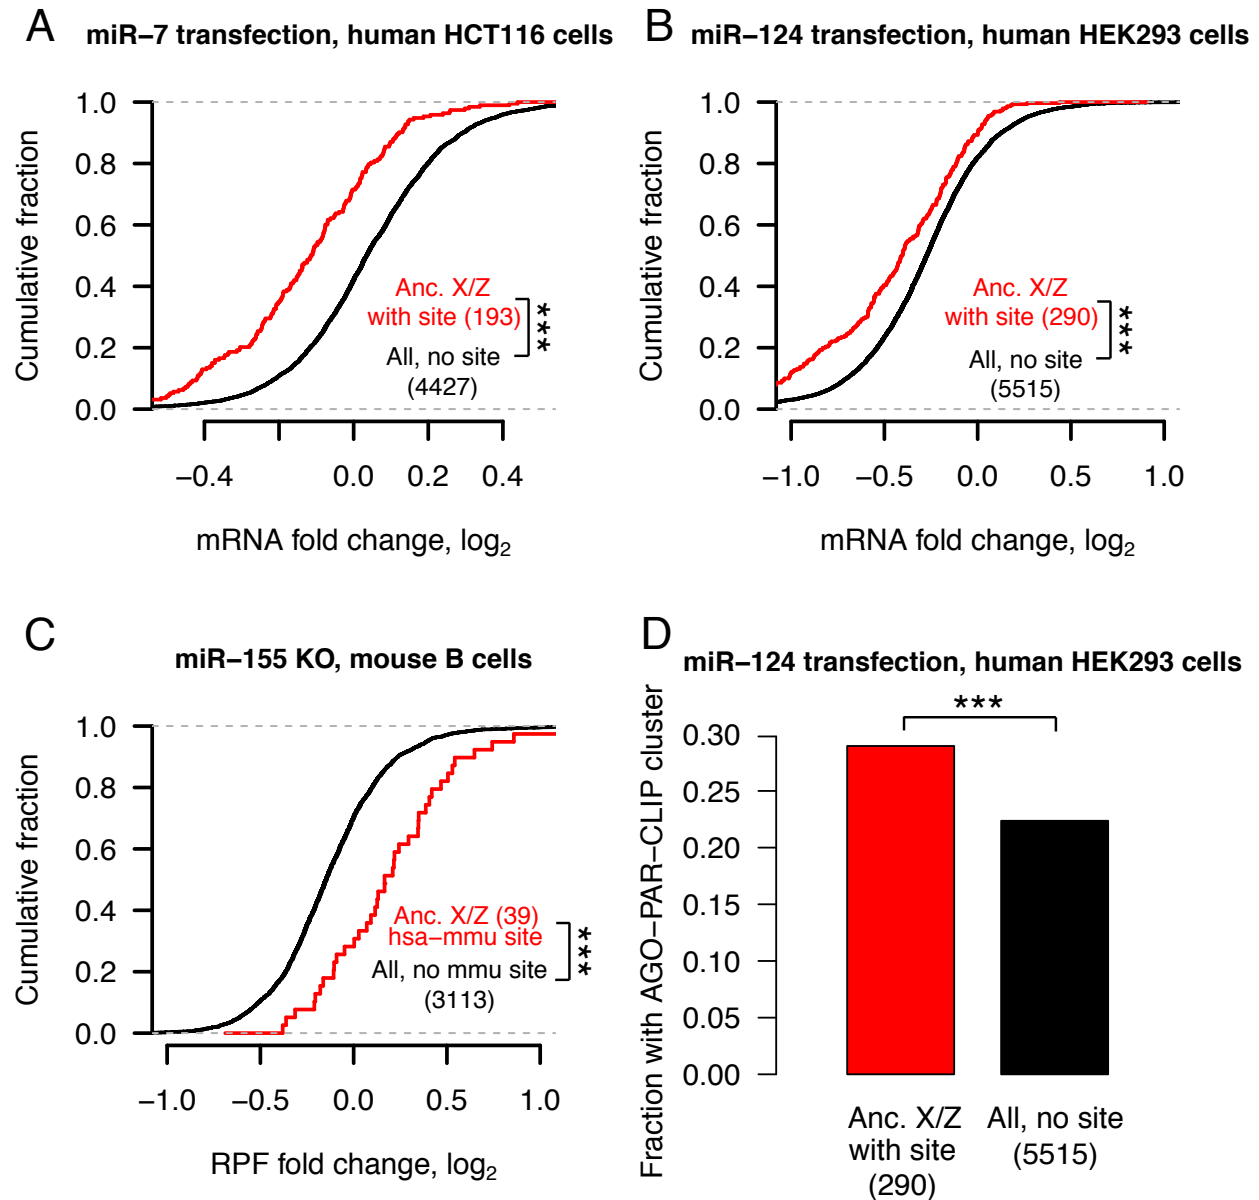

276  
277  
278  
279  
280  
281  
282  
283  
284  
285

**Figure 6. Analyses of experimental datasets validate miRNA target site efficacy.**

Distribution of changes in gene expression (A,B), in mRNA stability and translational efficiency as measured by ribosome protected fragments (RPF, C), and in fraction of Argonaute-bound genes (D) following miRNA transfection or knockout in the indicated cell-type. In each case, X-linked genes and the human orthologs of Z-linked genes containing target sites for the indicated miRNA were compared to all expressed genes lacking target sites; gene numbers are indicated in parentheses. (A-C) \*\*\*  $p < 0.001$ , two-sided Kolmogorov-Smirnov test. (D) \*\*\*  $p < 0.001$ , two-sided Fisher's exact test.

286  
287

## 288 **DISCUSSION**

289 Here, through phylogenetic and functional analysis of conserved microRNA (miRNA) targeting,  
290 we demonstrate preexisting heterogeneities in dosage sensitivity among genes on the mammalian  
291 X and avian Z chromosomes. We first showed that, across all human autosomal genes, dosage  
292 sensitivity -- as indicated by patterns of genic copy number variation -- correlates with the degree  
293 of conserved miRNA targeting. Turning to the sex chromosomes of mammals and birds, genes  
294 that retained a homolog on the sex-specific Y or W chromosome (X-Y and Z-W pairs) are more  
295 dosage-sensitive than genes with no Y or W homolog. In mammals, genes with no Y homolog  
296 that became subject to XCI are more dosage-sensitive than those that continued to escape XCI  
297 following Y gene decay. These differences in dosage sensitivity were present on the ancestral  
298 autosomes that gave rise to the mammalian and avian sex chromosomes. Finally, through  
299 analysis of publically available experimental datasets, we validated the efficacy, in living cells,  
300 of the miRNA target sites used to infer dosage sensitivity. We thus conclude that differences in  
301 dosage sensitivity among genes on the ancestral autosomes influenced their evolutionary  
302 trajectory during sex chromosome evolution, not only on the sex-specific Y and W chromosomes,  
303 but also on the sex-shared X chromosome.

304 We and others previously proposed that Y gene decay drove upregulation of homologous  
305 X-linked genes in both males and females, and that XCI subsequently evolved at genes sensitive  
306 to increased expression from two active X-linked copies in females (Jegalian & Page, 1998;  
307 Ohno, 1967). Our finding that X-inactivated genes have higher miRNA conservation scores than  
308 X escape genes is consistent with this model. However, our finding of heterogeneities in dosage  
309 sensitivity among the ancestral, autosomal precursors of both mammalian X-linked and avian Z-

310 linked genes challenges the previous assumption of a single evolutionary pathway for all sex-  
311 linked genes.

312 We therefore propose a model of X-Y and Z-W evolution in which the ancestral  
313 autosomes that gave rise to the mammalian and avian sex chromosomes contained three (or two,  
314 in the case of birds) classes of genes with differing dosage sensitivities (Figure 7A,B). For  
315 ancestral genes with high dosage sensitivity, Y or W gene decay would have been highly  
316 deleterious, and thus the Y- or W-linked genes were retained. According to our model, these  
317 genes' high dosage sensitivity also precluded upregulation of the X- or Z-linked homolog, and,  
318 in mammals, subsequent X-inactivation; indeed, their X-linked homologs continue to escape  
319 XCI (Bellott et al., 2014). For ancestral mammalian genes of intermediate dosage sensitivity, Y  
320 gene decay did occur, and was accompanied or followed by compensatory upregulation of the X-  
321 linked homolog in both sexes; the resultant increased expression in females was deleterious and  
322 led to the acquisition of XCI. Ancestral mammalian genes of low dosage sensitivity continued to  
323 escape XCI following Y decay, and perhaps did not undergo compensatory X upregulation  
324 (Figure 6A). These genes' dosage insensitivity set them apart biologically, and evolutionarily,  
325 from the other class of X-linked genes escaping XCI -- those with a surviving Y homolog.  
326



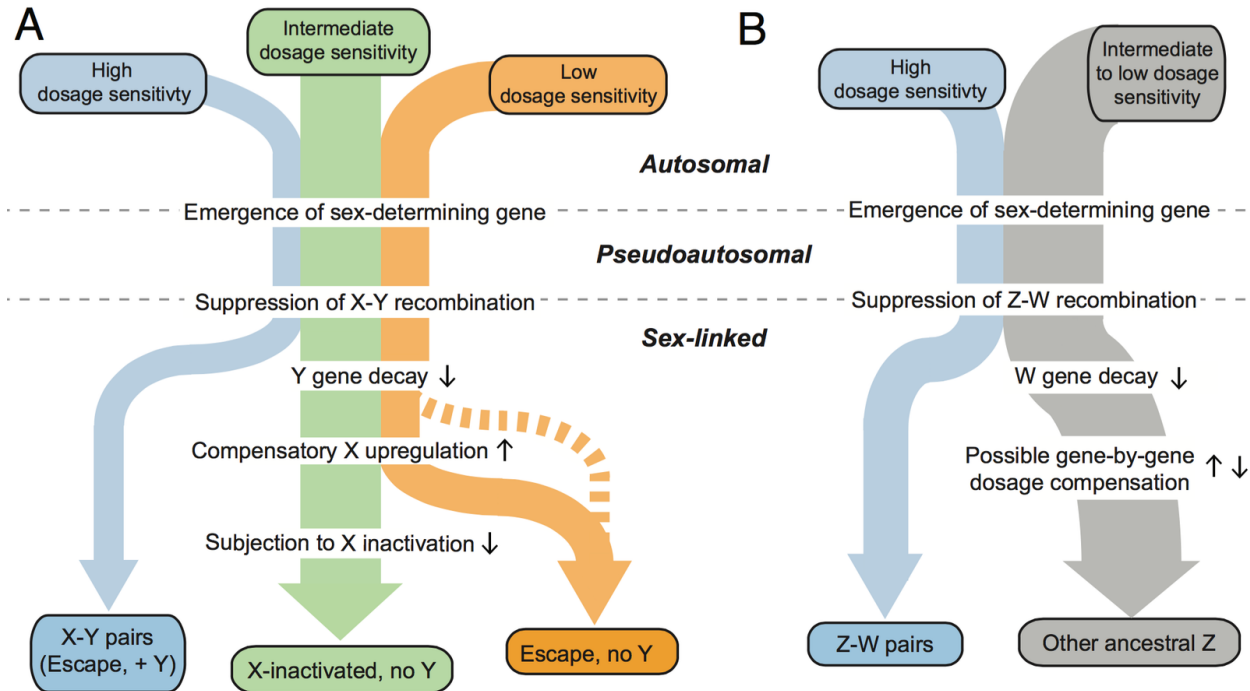

327  
328

329 **Figure 7. A proposed model of mammalian and avian sex chromosome evolution from**  
330 **ancestral autosomes.** In this model, preexisting heterogeneities in dosage sensitivity determined  
331 the trajectory of Y/W gene loss in both mammals and birds and of subsequent X-inactivation in  
332 mammals. Colored arrow widths are scaled approximately to the number of ancestral genes in  
333 each class. The dashed orange line represents the possibility that a subset of X-linked genes may  
334 have not undergone compensatory X upregulation following Y gene decay. Small black arrows  
335 adjacent to molecular evolutionary transitions indicate increases or decreases in sex-linked gene  
336 dosage.

337  
338  
339  
340

Previous studies have sought evidence of X-linked upregulation, during mammalian sex  
341 chromosome evolution, through comparisons of gene expression levels between the whole of the  
342 X chromosome and all of the autosomes, with equal numbers of studies rejecting or finding  
343 evidence consistent with upregulation (Deng et al., 2011; Julien et al., 2012; Kharchenko, Xi, &  
344 Park, 2011; Lin, Xing, Zhang, & He, 2012; Xiong et al., 2010). We find these difficulties  
345 unsurprising given the gene-by-gene heterogeneity in dosage sensitivities revealed by our present  
346 study. As mentioned above, X upregulation may have not evolved for genes of low dosage  
347 sensitivity. Among genes that did evolve X upregulation, gene-by-gene variation in the

348 evolutionary timing of the upregulation – determined by the time of Y gene decay and the  
349 relative dosage sensitivity of the X-linked homolog – could result in more recently upregulated  
350 genes showing a stronger signature of upregulation as assayed by current expression levels.  
351 Furthermore, constraint on X-linked gene dosage may vary across tissues, such that X  
352 upregulation evolved in different tissues for different genes. Such variation across both genes  
353 and tissues could confound approaches that assume either the presence or absence of a uniform,  
354 chromosome-wide signature of X upregulation within individual tissues. In avian lineages,  
355 heterogeneity in dosage sensitivities among the autosomal precursors of Z-linked genes, which  
356 our present study shows to be significant factor in W gene retention, may have caused Z dosage  
357 compensation to evolve on a gene-by-gene basis. Indeed, studies of Z-linked gene expression  
358 provide evidence for the gene-by-gene nature of Z dosage compensation (Itoh et al., 2007; Mank  
359 & Ellegren, 2009; Uebbing et al., 2015). In contrast to studies focusing on the readily apparent  
360 differences in dosage compensation mechanism between mammals and birds, our mechanistic  
361 findings and accompanying model highlight an aspect of dosage compensation of sex-linked  
362 genes that encompasses both birds and mammals.

363         In addition to highlighting similarities between mammals and birds, our study provides a  
364 view of dosage compensation that highlights post-transcriptional regulatory mechanisms.  
365 Previous studies have drawn inferences regarding post-transcriptional dosage compensation from  
366 measurements of extant protein abundance (Chen & Zhang, 2015; Uebbing et al., 2015). Our  
367 study points to specific non-coding sequences with known mechanisms (microRNA target sites)  
368 functioning across evolutionary time. Perhaps additional post-transcriptional regulatory  
369 mechanisms and their associated regulatory elements will be revealed to play roles in  
370 mammalian and avian dosage compensation.

371 Human disease studies support our model's claim that increased dosage of X-Y pairs and  
372 X-inactivated genes is deleterious to fitness. Copy number gains of the X-linked gene *KDM6A*,  
373 which has a surviving human Y homolog, are found in patients with developmental  
374 abnormalities and intellectual disability (Lindgren et al., 2013). *HDAC6*, *CACNA1F*, *GDII*, and  
375 *IRS4* all lack Y homologs and are subject to XCI in humans. A mutation in the 3' UTR of  
376 *HDAC6* abolishing targeting by miR-433 has been linked to familial chondrodysplasia in both  
377 sexes (Simon et al., 2010). Likely gain-of-function mutations in *CACNA1F* cause congenital  
378 stationary night blindness in both sexes (Hemara-Wahanui et al., 2005). Copy number changes of  
379 *GDII* correlate with the severity of X-linked mental retardation in males, with female carriers  
380 preferentially inactivating the mutant allele (Vandewalle et al., 2009). Somatic genomic deletions  
381 downstream of *IRS4* lead to its overexpression in lung squamous carcinoma (Weischenfeldt et al.,  
382 2017). Males with partial X disomy due to translocation of the distal long arm of the X  
383 chromosome (Xq28) to the long arm of the Y chromosome show severe mental retardation and  
384 developmental defects (Lahn et al., 1994). Most genes in Xq28 are inactivated in 46,XX females  
385 but escape inactivation in such X;Y translocations, suggesting that increased dosage of Xq28  
386 genes caused the cognitive and developmental defects. We anticipate that further studies will  
387 reveal additional examples of the deleterious effects of overexpression of X-Y pairs and X-  
388 inactivated genes.

389 Recent work has revealed that the sex-specific chromosome -- the Y in mammals and the  
390 W in birds -- convergently retained dosage-sensitive genes with important regulatory functions  
391 (Bellott et al., 2014, 2017). Our study provides direct evidence that such heterogeneity in dosage  
392 sensitivity existed on the ancestral autosomes that gave rise to the mammalian and avian sex  
393 chromosomes. This heterogeneity influenced both survival on the sex-specific chromosomes in

394 mammals and birds and the evolution of XCI in mammals. Thus, two independent experiments  
395 of nature have shown that modern-day amniote sex chromosomes were shaped, during evolution,  
396 by the properties of the ancestral autosomes from which they derive.

## 397 **METHODS**

### 398 **Human genic copy number variation**

399 To annotate gene deletions and duplications, we used data from the Exome Aggregation  
400 Consortium (ExAC, RRID:SCR\_004068)  
401 ([ftp://ftp.broadinstitute.org/pub/ExAC\\_release/release0.3.1/cnv/](ftp://ftp.broadinstitute.org/pub/ExAC_release/release0.3.1/cnv/)), which consists of autosomal  
402 genic duplications and deletions (both full and partial) called in 59,898 exomes (Ruderfer et al.,  
403 2016). We used the publicly available genic deletion counts but re-computed genic duplication  
404 counts using only full duplications, reasoning that partial duplications are unlikely to result in  
405 increased dosage of the full gene product. We thus required that an individual duplication fully  
406 overlapped the longest protein-coding transcript (GENCODE v19) of a gene using BEDtools  
407 (RRID:SCR\_006646) (Quinlan & Hall, 2010). We removed genes flagged by ExAC as lying in  
408 known regions of recurrent CNVs. This yielded 4,118 genes within duplications and deletions,  
409 3,976 genes within deletions but not duplications, 2,916 genes within duplications but not  
410 deletions, and 3,510 genes not subject to duplication or deletion.

411

### 412 **X-linked gene sets**

413 Analyses of conserved miRNA targeting based on multiple species alignments are unreliable for  
414 multicopy or ampliconic genes due to ambiguous sequence alignment between species. To avoid  
415 such issues, we first removed multicopy and ampliconic genes (Mueller et al., 2013) from a  
416 previously published set of human X genes present in the amniote ancestor (Bellott et al., 2014).  
417 We then excluded genes in the human pseudoautosomal (PAR) regions since these genes have  
418 not been exposed to the same evolutionary forces as genes in regions where X-Y recombination  
419 has been suppressed. Of the remaining ancestral X genes, we classified the 15 genes with human

420 Y-linked homologs as X-Y pairs. We also analyzed the larger set of 32 X-Y pairs across eight  
421 mammals (human, chimpanzee, rhesus macaque, marmoset, mouse, rat, bull, and opossum) with  
422 sequenced Y chromosomes (Bellott et al., 2014).

423 To classify ancestral X-linked genes without Y homologs as subject to or escaping XCI  
424 in humans, we used a collection of consensus XCI calls which aggregate the results of three  
425 studies (Carrel & Willard, 2005; Cotton et al., 2013, 2015) assaying XCI escape (Balaton et al.,  
426 2015). Out of 472 ancestral X genes without a human Y homolog assigned an XCI status by  
427 Balaton et al. (Balaton et al., 2015), 329 were subject to XCI (“Subject” or “Mostly subject” in  
428 Balaton et al.), 26 displayed variable escape (“Variable escape” or “Mostly variable escape”)  
429 from XCI, and 30 showed consistent escape (“Escape” or “Mostly escape”). We excluded 40  
430 ancestral X genes with a “Discordant” XCI status as assigned by Balaton et al. In the main text,  
431 we present results obtained after combining both variable and consistent escape calls from  
432 Balaton et al. into one class, yielding the following counts: 15 X-Y pairs, 329 ancestral X genes  
433 subject to XCI, and 56 ancestral X genes with evidence of escape from XCI. We also performed  
434 analyses considering escape and variable escape genes separately (Figure 2 – figure supplement  
435 3).

436

### 437 **Z-linked gene sets**

438 We previously refined the ancestral gene content of the avian sex chromosomes to 685 Z-linked  
439 genes with human orthologs by sequencing of the chicken Z chromosome and analysis of 13  
440 other avian species with published female genomes (Bellott et al., 2017). Of these 685 ancestral  
441 Z genes, 28 retained a homolog on the fully sequenced chicken W chromosome. Including three  
442 additional avian species in which candidate W-linked genes were ascertained by directly

443 comparing male and female genome assemblies results in a total of 78 W-linked genes. Including  
444 another 10 avian species in which W-linkage was inferred by read depth changes in a female  
445 genome results in a total of 157 W-linked genes.

446

#### 447 **microRNA target site $P_{CT}$ scores**

448 Summaries of all gene-miRNA family interactions were obtained from TargetScanHuman v7.1  
449 (RRID:SCR\_010845)([http://www.targetscan.org/vert\\_71/vert\\_71\\_data\\_download/Summary\\_Co](http://www.targetscan.org/vert_71/vert_71_data_download/Summary_Co)  
450 [unts.all\\_predictions.txt.zip](http://www.targetscan.org/vert_71/vert_71_data_download/Summary_Co)). We excluded mammalian-specific miRNA families based on  
451 classifications by Friedman et al (Friedman et al., 2009) and updated in TargetScanHuman  
452 v7.1(Agarwal, Bell, Nam, & Bartel, 2015). To account for gene-specific variability in the  
453 number and  $P_{CT}$  score of gene-miRNA interactions within a group of genes, we sampled 1000x  
454 with replacement from the same group of genes and computed the mean gene-miRNA  $P_{CT}$  score  
455 for all associated gene miRNA interactions from each sampling. These 1000 samplings were  
456 then used to estimate the median resampled gene-miRNA  $P_{CT}$  and 95% confidence intervals. To  
457 compare  $P_{CT}$  scores between two sets of genes while matching by haploinsufficiency probability  
458 (Huang et al., 2010), we binned the smaller of the two gene sets into quintiles based on the  
459 assigned haploinsufficiency probabilities. We then binned the second gene set based on these  
460 same quintiles. For each of 1000 samplings, we randomly drew  $n$  genes from the second set from  
461 each of the quintile bins, where  $n$  is the number of genes from the first set assigned to that  
462 quintile. We computed a mean gene-miRNA  $P_{CT}$  score from each randomly sampled gene set  
463 and used this distribution to compute an empirical one-sided P-value.

464

465

## 466 **Human-chicken conserved microRNA target sites**

467 Site-wise alignment information was obtained from TargetScanHuman v7.1  
468 ([http://www.targetscan.org/vert\\_71/vert\\_71\\_data\\_download/Conserved\\_Family\\_Info.txt.zip](http://www.targetscan.org/vert_71/vert_71_data_download/Conserved_Family_Info.txt.zip)). To  
469 determine which target sites are present in the 3' UTRs of both human and chicken orthologs, we  
470 counted, for genes with both a human and chicken ortholog, the number of miRNA interactions  
471 that had at least one target site in both human and chicken. To control for gene-specific  
472 background 3' UTR conservation, we generated six control k-mers for each miRNA family seed  
473 sequence that were matched exactly for nucleotide and CpG content. Six was the maximum  
474 number of unique control k-mers that could be generated for all sequences. We repeated the  
475 above counting analysis with each of the control k-mers using scripts from TargetScan, and  
476 compared, for each gene, the observed number of human-chicken-conserved miRNA interactions  
477 (the observed conservation signal) to the average number from controls (the background  
478 conservation).

479

## 480 **Gene expression profiling and crosslinking datasets**

481 Changes in mRNA expression from a compendium of small RNA (sRNA) transfections  
482 (corresponding to twelve different miRNAs) in HeLa cells were obtained from Agarwal and  
483 colleagues, who carefully normalized microarray data (Agarwal et al., 2015). Further datasets  
484 describing the effects of transfecting miR-103 in HCT116 cells (Linsley et al., 2007), knocking  
485 down miR-92a in HEK293 cells (Hafner et al., 2010), transfecting miR-7 or miR-124 in  
486 HEK293 cells (Hausser, Landthaler, Jaskiewicz, Gaidatzis, & Zavolan, 2009), or of knocking out  
487 miR-155 in mouse B cells (Eichhorn et al., 2014), T cells (Loeb et al., 2012), or Th1 and Th2  
488 cells (Rodriguez et al., 2007), processed as described in (Agarwal et al., 2015), were provided by



489 V. Agarwal. Targets for the PAR-CLIP study (Hafner et al., 2010) were inferred from an online  
490 resource of HEK293 clusters observed after transfection of either miR-124  
491 ([http://www.mirz.unibas.ch/restricted/clipdata/RESULTS/miR124\\_](http://www.mirz.unibas.ch/restricted/clipdata/RESULTS/miR124_TRANSFECTION/miR124_)  
492 [TRANSFECTION.html](http://www.mirz.unibas.ch/restricted/clipdata/RESULTS/miR124_TRANSFECTION/miR124_TRANSFECTION.html)) or miR-7  
493 ([http://www.mirz.unibas.ch/restricted/clipdata/RESULTS/miR7\\_](http://www.mirz.unibas.ch/restricted/clipdata/RESULTS/miR7_TRANSFECTION/miR7_TRA)  
494 [NSFECTION.html](http://www.mirz.unibas.ch/restricted/clipdata/RESULTS/miR7_TRANSFECTION/miR7_TRANSFECTION.html)).

495

#### 496 **Data availability**

497 Data supporting the findings of this study are available within the paper and its supplementary  
498 information files.

499

#### 500 **Code availability**

501 Custom scripts in R (RRID:SCR\_001905) were used to generate figures. A custom Python  
502 (RRID:SCR\_008394) script utilizing Biopython (RRID:SCR\_007173) was used to generate  
503 shuffled miRNA family seed sequences; all code is available upon request from the authors.  
504 Identification of miRNA target site matches using shuffled seed sequences was performed using  
505 the ‘targetscan\_70.pl’ perl script  
506 ([http://www.targetscan.org/vert\\_71/vert\\_71\\_data\\_download/targetscan\\_70.zip](http://www.targetscan.org/vert_71/vert_71_data_download/targetscan_70.zip)).

507 **Author contributions**

508 S.N., D.W.B. and D.C.P designed the study. S.N. performed analyses with assistance from

509 D.W.B. S.N. and D.C.P wrote the paper.

510

511 **Acknowledgements**

512 We thank V. Agarwal, S. Eichorn, S. McGeary, and D. Bartel for assistance with the TargetScan

513 database and helpful discussions; A. Godfrey for updated human-chicken orthology information;

514 and A. Godfrey, J. Hughes and H. Skaletsky for critical reading of the manuscript. This work

515 was supported by the National Institutes of Health and the Howard Hughes Medical Institute.

516 S.N. was supported under a research grant by Biogen.

517

518 **Competing Financial Interests**

519 The authors declare no competing financial interests.

- 520 Agarwal, V., Bell, G. W., Nam, J., and Bartel, D. P. (2015). Predicting effective microRNA  
521 target sites in mammalian mRNAs. *eLife*, 4, e05005. <https://doi.org/10.7554/eLife.05005>
- 522 Balaton, B. P., Cotton, A. M., and Brown, C. J. (2015). Derivation of consensus inactivation  
523 status for X-linked genes from genome-wide studies. *Biology of Sex Differences*, 6, 35.  
524 <https://doi.org/10.1186/s13293-015-0053-7>
- 525 Bartel, D. P. (2009). MicroRNAs: target recognition and regulatory functions. *Cell*, 136(2), 215–  
526 233. <https://doi.org/10.1016/j.cell.2009.01.002>
- 527 Bellott, D. W., Hughes, J. F., Skaletsky, H., Brown, L. G., Pyntikova, T., Cho, T.-J., Koutseva,  
528 N., Zaghlul, S., Graves, T., Rock, S., Kremitzki, C., Fulton, R. S., Dugan, S., Ding, Y.,  
529 Morton, D., Khan, Z., Lewis, L., ... Page, D. C. (2014). Mammalian Y chromosomes retain  
530 widely expressed dosage-sensitive regulators. *Nature*, 508(7497), 494–499.  
531 <https://doi.org/10.1038/nature13206>
- 532 Bellott, D. W., Skaletsky, H., Cho, T.-J., Brown, L., Locke, D., Chen, N., Galkina, S., Pyntikova,  
533 T., Koutseva, N., Graves, T., Kremitzki, C., Warren, W. C., Clark, A. G., Gaginskaya, E.,  
534 Wilson, R. K., and Page, D. C. (2017). Avian W and mammalian Y chromosomes  
535 convergently retained dosage-sensitive regulators. *Nature Genetics*, ePub.
- 536 Bellott, D. W., Skaletsky, H., Pyntikova, T., Mardis, E. R., Graves, T., Kremitzki, C., Brown, L.  
537 G., Rozen, S., Warren, W. C., Wilson, R. K., and Page, D. C. (2010). Convergent evolution  
538 of chicken Z and human X chromosomes by expansion and gene acquisition. *Nature*,  
539 466(7306), 612–616. <https://doi.org/10.1038/nature09172>
- 540 Carrel, L., and Willard, H. F. (2005). X-inactivation profile reveals extensive variability in X-  
541 linked gene expression in females. *Nature*, 434(March), 400–404.  
542 <https://doi.org/10.1038/nature03479>
- 543 Chen, X., and Zhang, J. (2015). No X-chromosome dosage compensation in human proteomes.  
544 *Molecular Biology and Evolution*, 32(6), 1456–1460.  
545 <https://doi.org/10.1093/molbev/msv036>
- 546 Cotton, A. M., Ge, B., Light, N., Adoue, V., Pastinen, T., and Brown, C. J. (2013). Analysis of  
547 expressed SNPs identifies variable extents of expression from the human inactive X  
548 chromosome. *Genome Biology*, 14(11), R122. <https://doi.org/10.1186/gb-2013-14-11-r122>
- 549 Cotton, A. M., Price, E. M., Jones, M. J., Balaton, B. P., Kobor, M. S., and Brown, C. J. (2015).  
550 Landscape of DNA methylation on the X chromosome reflects CpG density, functional  
551 chromatin state and X-chromosome inactivation. *Human Molecular Genetics*, 24(6), 1528–  
552 1539. <https://doi.org/10.1093/hmg/ddu564>
- 553 Deng, X., Hiatt, J. B., Nguyen, D. K., Ercan, S., Sturgill, D., Hillier, L. W., Schlesinger, F.,  
554 Davis, C. a, Reinke, V. J., Gingeras, T. R., Shendure, J., Waterston, R. H., Oliver, B., Lieb,  
555 J. D., and Disteche, C. M. (2011). Evidence for compensatory upregulation of expressed X-  
556 linked genes in mammals, *Caenorhabditis elegans* and *Drosophila melanogaster*. *Nature*  
557 *Genetics*, 43(12), 1179–1185. <https://doi.org/10.1038/ng.948>
- 558 Eichhorn, S. W., Guo, H., McGeary, S. E., Rodriguez-Mias, R. a, Shin, C., Baek, D., Hsu, S.-H.,  
559 Ghoshal, K., Villén, J., and Bartel, D. P. (2014). mRNA Destabilization Is the Dominant  
560 Effect of Mammalian MicroRNAs by the Time Substantial Repression Ensues. *Molecular*  
561 *Cell*. <https://doi.org/10.1016/j.molcel.2014.08.028>
- 562 Friedman, R. C., Farh, K. K.-H., Burge, C. B., and Bartel, D. P. (2009). Most mammalian  
563 mRNAs are conserved targets of microRNAs. *Genome Research*, 19(1), 92–105.  
564 <https://doi.org/10.1101/gr.082701.108>
- 565 Hafner, M., Landthaler, M., Burger, L., Khorshid, M., Berninger, P., Rothballer, A., Jr, M. A.,

- 566 Munschauer, M., Ulrich, A., Wardle, G. S., Dewell, S., Zavolan, M., and Tuschl, T. (2010).  
567 Transcriptome-wide identification of RNA-binding protein and microRNA target sites by  
568 PAR-CLIP. *Cell*, *141*(1), 129–141.  
569 <https://doi.org/10.1016/j.cell.2010.03.009>. Transcriptome-wide
- 570 Hausser, J., Landthaler, M., Jaskiewicz, L., Gaidatzis, D., and Zavolan, M. (2009). mRNA  
571 binding of Argonaute / EIF2C – miRNA complexes and the degradation of miRNA targets  
572 Relative contribution of sequence and structure features to the mRNA binding of Argonaute  
573 / EIF2C – miRNA complexes and the degradation of miRNA targets. *Genome Research*,  
574 2009–2020. <https://doi.org/10.1101/gr.091181.109>
- 575 Hemara-Wahanui, A., Berjukow, S., Hope, C. I., Dearden, P. K., Wu, S.-B., Wilson-Wheeler, J.,  
576 Sharp, D. M., Lundon-Treweek, P., Clover, G. M., Hoda, J.-C., Striessnig, J., Marksteiner,  
577 R., Hering, S., and Maw, M. a. (2005). A CACNA1F mutation identified in an X-linked  
578 retinal disorder shifts the voltage dependence of Cav1.4 channel activation. *Proceedings of*  
579 *the National Academy of Sciences of the United States of America*, *102*(21), 7553–7558.  
580 <https://doi.org/10.1073/pnas.0501907102>
- 581 Huang, N., Lee, I., Marcotte, E. M., and Hurles, M. E. (2010). Characterising and predicting  
582 haploinsufficiency in the human genome. *PLoS Genetics*, *6*(10), e1001154.  
583 <https://doi.org/10.1371/journal.pgen.1001154>
- 584 Hughes, J. F., Skaletsky, H., Brown, L. G., Pyntikova, T., Graves, T., Fulton, R. S., Dugan, S.,  
585 Ding, Y., Buhay, C. J., Kremitzki, C., Wang, Q., Shen, H., Holder, M., Villasana, D.,  
586 Nazareth, L. V., Cree, A., Courtney, L., ... Page, D. C. (2012). Strict evolutionary  
587 conservation followed rapid gene loss on human and rhesus Y chromosomes. *Nature*,  
588 *483*(7387), 82–86. <https://doi.org/10.1038/nature10843>
- 589 Itoh, Y., Melamed, E., Yang, X., Kampf, K., Wang, S., Yehya, N., Van Nas, A., Replogle, K.,  
590 Band, M. R., Clayton, D. F., Schadt, E. E., Lusk, A. J., and Arnold, A. P. (2007). Dosage  
591 compensation is less effective in birds than in mammals. *Journal of Biology*, *6*(1), 2.  
592 <https://doi.org/10.1186/jbiol53>
- 593 Jegalian, K., and Page, D. C. (1998). A proposed path by which genes common to mammalian X  
594 and Y chromosomes evolve to become X inactivated. *Nature*, *394*(August), 776–780.  
595 Retrieved from <http://www.nature.com/nature/journal/v394/n6695/abs/394776a0.html>
- 596 Julien, P., Brawand, D., Soumillon, M., Necsulea, A., Liechti, A., Schütz, F., Daish, T., Grützner,  
597 F., and Kaessmann, H. (2012, January). Mechanisms and evolutionary patterns of  
598 mammalian and avian dosage compensation. *PLoS Biology*.  
599 <https://doi.org/10.1371/journal.pbio.1001328>
- 600 Kharchenko, P. V, Xi, R., and Park, P. J. (2011). Evidence for dosage compensation between the  
601 X chromosome and autosomes in mammals. *Nature Genetics*, *43*(12), 1167–1169.  
602 <https://doi.org/10.1038/ng.991>
- 603 Lahn, B. T., Ma, N., Breg, R. W., Stratton, R., Surti, U., and Page, D. C. (1994). Xq-Yq  
604 interchange resulting in supernormal X-linked gene expression in severely retarded males  
605 with 46,XYq- karyotype. *Nature*, *8*, 362–369. <https://doi.org/10.1038/ng1294-340>
- 606 Lahn, B. T., and Page, D. C. (1999). Four evolutionary strata on the human X chromosome.  
607 *Science*, *286*(5441), 964–967. <https://doi.org/10.1126/science.286.5441.964>
- 608 Lin, F., Xing, K., Zhang, J., and He, X. (2012). Expression reduction in mammalian X  
609 chromosome evolution refutes Ohno’s hypothesis of dosage compensation. *Proceedings of*  
610 *the National Academy of Sciences*, *109*(29), 11752–11757.  
611 <https://doi.org/10.1073/pnas.1201816109>

- 612 Lindgren, A. M., Hoyos, T., Talkowski, M. E., Hanscom, C., Blumenthal, I., Chiang, C., Ernst,  
613 C., Pereira, S., Ordulu, Z., Clericuzio, C., Drautz, J. M., Rosenfeld, J. a, Shaffer, L. G.,  
614 Velsher, L., Pynn, T., Vermeesch, J., Harris, D. J., ... Morton, C. C. (2013).  
615 Haploinsufficiency of KDM6A is associated with severe psychomotor retardation, global  
616 growth restriction, seizures and cleft palate. *Human Genetics*, 132(5), 537–52.  
617 <https://doi.org/10.1007/s00439-013-1263-x>
- 618 Linsley, P. S., Schelter, J., Burchard, J., Kibukawa, M., Martin, M. M., Bartz, S. R., Johnson, J.  
619 M., Cummins, J. M., Raymond, C. K., Dai, H., Chau, N., Cleary, M., Jackson, A. L.,  
620 Carleton, M., and Lim, L. (2007). Transcripts targeted by the microRNA-16 family  
621 cooperatively regulate cell cycle progression. *Mol Cell Biol*, 27(6), 2240–2252.  
622 <https://doi.org/10.1128/MCB.02005-06>
- 623 Loeb, G. B., Khan, A. A., Canner, D., Hiatt, J. B., Shendure, J., Darnell, R. B., Leslie, C. S., and  
624 Rudensky, A. Y. (2012). Transcriptome-wide miR-155 Binding Map Reveals Widespread  
625 Noncanonical MicroRNA Targeting. *Molecular Cell*, 48(5), 760–770.  
626 <https://doi.org/http://dx.doi.org/10.1016/j.molcel.2012.10.002>
- 627 Mank, J. E., and Ellegren, H. (2009). All dosage compensation is local: gene-by-gene regulation  
628 of sex-biased expression on the chicken Z chromosome. *Heredity*, 102(3), 312–320.  
629 <https://doi.org/10.1038/hdy.2008.116>
- 630 Mueller, J. L., Skaletsky, H., Brown, L. G., Zaghul, S., Rock, S., Graves, T., Auger, K., Warren,  
631 W. C., Wilson, R. K., and Page, D. C. (2013). Independent specialization of the human and  
632 mouse X chromosomes for the male germ line. *Nature Genetics*, 45(9), 1083–1087.  
633 <https://doi.org/10.1038/ng.2705>
- 634 Mullon, C., Wright, A. E., Reuter, M., Pomiankowski, A., and Mank, J. E. (2015). Evolution of  
635 dosage compensation under sexual selection differs between X and Z chromosomes. *Nature*  
636 *Communications*, 6, 7720. <https://doi.org/10.1038/ncomms8720>
- 637 Nanda, I., Shan, Z., Schartl, M., Burt, D. W., Koehler, M., Nothwang, H., Grützner, F., Paton, I.  
638 R., Windsor, D., Dunn, I., Engel, W., Staeheli, P., Mizuno, S., Haaf, T., and Schmid, M.  
639 (1999). 300 million years of conserved synteny between chicken Z and human chromosome  
640 9. *Nature Genetics*, 21(march), 258–259. <https://doi.org/10.1038/6769>
- 641 Ohno, S. (1967). *Sex chromosomes and sex-linked genes*. Springer-Verlag.
- 642 Quinlan, A. R., and Hall, I. M. (2010). BEDTools: A flexible suite of utilities for comparing  
643 genomic features. *Bioinformatics*, 26(6), 841–842.  
644 <https://doi.org/10.1093/bioinformatics/btq033>
- 645 Rodriguez, A., Vigorito, E., Clare, S., Warren, M. V, Couttet, P., Soond, D. R., Dongen, S. Van,  
646 Grocock, R. J., Das, P. P., Miska, E. A., Vetrie, D., Okkenhaug, K., Enright, A. J., Dougan,  
647 G., Turner, M., and Bradley, A. (2007). Requirement of bic/microRNA-155 for normal  
648 immune function. *Science*, 981(April), 608–611. <https://doi.org/10.1126/science.1139253>
- 649 Ross, M. T., Grafham, D. V, Coffey, A. J., Scherer, S., McLay, K., Muzny, D., and Platzer, M.  
650 (2005). The DNA sequence of the human X chromosome. *Nature*, 434(March), 325–337.
- 651 Ruderfer, D. M., Hamamsy, T., Lek, M., Karczewski, K. J., Kavanagh, D., Samocha, K. E.,  
652 Exome Aggregation Consortium, Daly, M. J., MacArthur, D. G., Fromer, M., and Purcell, S.  
653 M. (2016). Patterns of genic intolerance of rare copy number variation in 59,898 human  
654 exomes. *Nature Genetics*, 48(10), 1107–1111. <https://doi.org/10.1038/ng.3638>
- 655 Simon, D., Laloo, B., Barillot, M., Barnetche, T., Blanchard, C., Rooryck, C., Marche, M.,  
656 Burgelin, I., Coupry, I., Chassaing, N., Gilbert-Dussardier, B., Lacombe, D., Grosset, C.,  
657 and Arveiler, B. (2010). A mutation in the 3'-UTR of the HDAC6 gene abolishing the post-

- 658 transcriptional regulation mediated by hsa-miR-433 is linked to a new form of dominant X-  
659 linked chondrodysplasia. *Human Molecular Genetics*, 19(10), 2015–2027.  
660 <https://doi.org/10.1093/hmg/ddq083>
- 661 Skaletsky, H., Kuroda-kawaguchi, T., Minx, P. J., Cordum, H. S., Hillier, L., Brown, L. G.,  
662 Repping, S., Pyntikova, T., Ali, J., Bieri, T., Chinwalla, A., Delehaunty, A., Delehaunty, K.,  
663 Du, H., Fewell, G., Fulton, L., Fulton, R., ... Page, D. C. (2003). The male-specific region  
664 of the human Y chromosome is a mosaic of discrete sequence classes. *Nature*, 423, 825–  
665 838.
- 666 Uebbing, S., Konzer, A., Xu, L., Backström, N., Brunström, B., Bergquist, J., and Ellegren, H.  
667 (2015). Quantitative mass spectrometry reveals partial translational regulation for dosage  
668 compensation in chicken. *Molecular Biology and Evolution*, 32(10), 2716–2725.  
669 <https://doi.org/10.1093/molbev/msv147>
- 670 Vandewalle, J., Van Esch, H., Govaerts, K., Verbeeck, J., Zweier, C., Madrigal, I., Mila, M.,  
671 Pijkels, E., Fernandez, I., Kohlhase, J., Spaich, C., Rauch, A., Fryns, J. P., Marynen, P., and  
672 Froyen, G. (2009). Dosage-dependent severity of the phenotype in patients with mental  
673 retardation due to a recurrent copy-number gain at Xq28 mediated by an unusual  
674 recombination. *American Journal of Human Genetics*, 85(6), 809–822.  
675 <https://doi.org/10.1016/j.ajhg.2009.10.019>
- 676 Weischenfeldt, J., Dubash, T., Drainas, A. P., Mardin, B. R., Chen, Y., Stütz, A. M., Waszak, S.  
677 M., Bosco, G., Halvorsen, A. R., Raeder, B., Efthymiopoulos, T., Erkek, S., Siegl, C.,  
678 Brenner, H., Brustugun, O. T., Dieter, S. M., Northcott, P. A., ... Korbel, J. O. (2017). Pan-  
679 cancer analysis of somatic copy-number alterations implicates IRS4 and IGF2 in enhancer  
680 hijacking. *Nature Genetics*, 49, 65–74. <https://doi.org/10.1038/ng.3722>
- 681 Wright, A. E., Zimmer, F., Harrison, P. W., and Mank, J. E. (2015). Conservation of regional  
682 variation in sex-specific sex chromosome regulation. *Genetics*, 201(2), 587–598.  
683 <https://doi.org/10.1534/genetics.115.179234>
- 684 Xiong, Y., Chen, X., Chen, Z., Wang, X., Shi, S., Wang, X., Zhang, J., and He, X. (2010). RNA  
685 sequencing shows no dosage compensation of the active X-chromosome. *Nature Genetics*,  
686 42(12), 1043–1047. <https://doi.org/10.1038/ng.711>
- 687 Yang, F., Babak, T., Shendure, J., and Disteche, C. M. (2010). Global survey of escape from X  
688 inactivation by RNA-sequencing in mouse. *Genome Research*, 20(5), 614–622.  
689 <https://doi.org/10.1101/gr.103200.109>
- 690 Zhou, Q., Zhang, J., Bachtrog, D., An, N., Huang, Q., Jarvis, E. D., Gilbert, M. T. P., and Zhang,  
691 G. (2014). Complex evolutionary trajectories of sex chromosomes across bird taxa. *Science*,  
692 346(6215), 1246338. <https://doi.org/10.1126/science.1246338>  
693

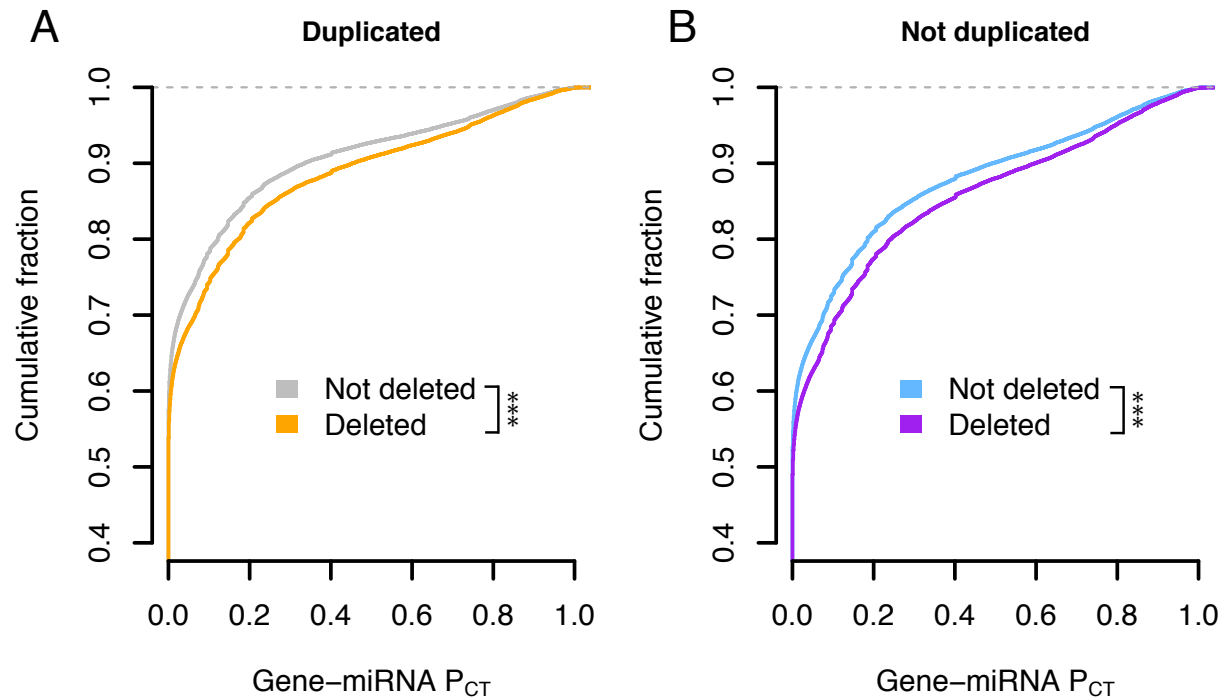

694

695 **Figure 1 – Figure Supplement 1: Effect of deletion status on autosomal  $P_{CT}$  scores.**

696 Probabilities of conserved targeting ( $P_{CT}$ ) of all gene-miRNA interactions involving non-deleted  
697 and deleted genes, further stratified as (A) duplicated (grey,  $n = 69,339$  interactions from 4,118  
698 genes; orange,  $n = 51,514$  interactions from 2,916 genes) or (B) not duplicated (purple,  $n =$   
699 72,826 interactions from 3,510 genes; blue,  $n = 80,290$  interactions from 3,976 genes). \*\*\*  $p <$   
700 0.001, two-sided Kolmogorov-Smirnov test.

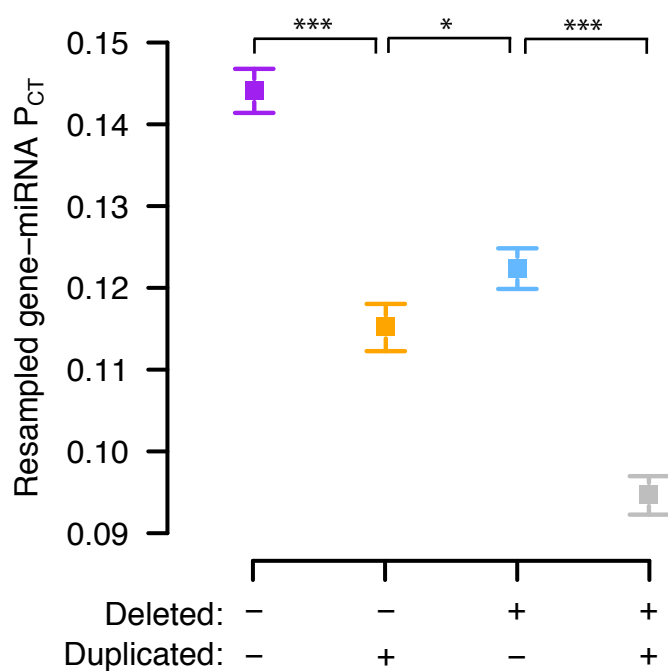

701  
702 **Figure 1 – Figure Supplement 2: Resampled mean  $P_{CT}$  scores of autosomal genes stratified**  
703 **by copy number variation in 59,898 human exomes.** Non-duplicated and duplicated genes  
704 were further stratified as deleted (blue,  $n = 3,976$  genes; grey,  $n = 4,118$  genes) or not deleted  
705 (purple,  $n = 3,510$  genes; orange,  $n = 2,916$  genes). Points and error bars represent the median  
706 and 95% confidence intervals of  $P_{CT}$  scores from 1,000 gene samplings with replacement. \*  $p <$   
707  $0.05$ , \*\*\*  $p < 0.001$ , empirical p-value computed as the fraction of random non-overlapping gene  
708 sets with a median difference in  $P_{CT}$  score at least as large as the true difference.



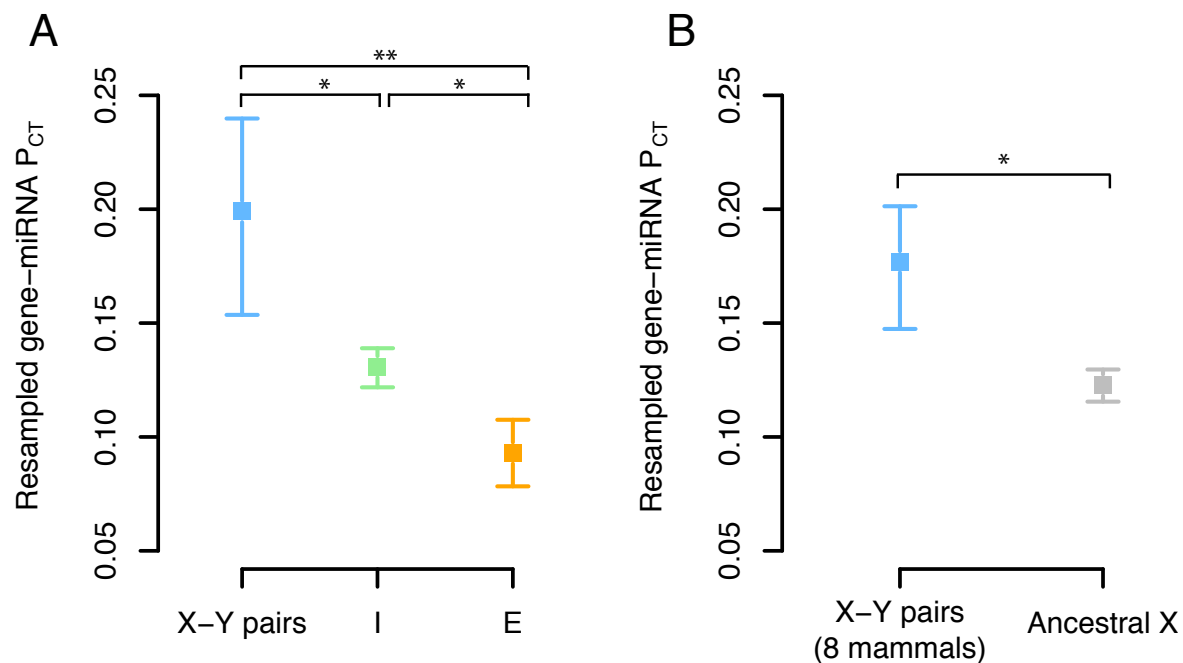

709

710 **Figure 2 – Figure Supplement 1: Resampled mean  $P_{CT}$  scores of X-linked genes. (A)**

711 Resampled gene-miRNA  $P_{CT}$  scores for human X-Y pairs ( $n = 15$  genes), X-inactivated genes ( $n$

712 = 329 genes) and X escape genes ( $n = 56$  genes). (B) Resampled gene-miRNA  $P_{CT}$  scores for X-

713 Y pairs across eight mammals ( $n = 32$  genes) and genes with no Y homolog in any of eight

714 mammals ( $n = 457$  genes). Points and error bars represent the median and 95% confidence

715 intervals from 1,000 gene samplings with replacement. \*  $p < 0.05$ , \*\*  $p < 0.01$ , empirical p-value

716 computed as the fraction of random non-overlapping gene sets with a median difference in  $P_{CT}$

717 score at least as large as the true difference.

| <b>Foreground</b>  | <b>Mean P<sub>CT</sub></b> | <b>pHI-matched background</b> | <b>Empirical p-value</b> |
|--------------------|----------------------------|-------------------------------|--------------------------|
| Human X-Y pairs    | 0.199                      | X-inactivated                 | 0.052                    |
| Human X-Y pairs    | 0.199                      | X escape                      | <b>&lt; 0.001</b>        |
| Human X-Y pairs    | 0.199                      | X-inactivated and X escape    | <b>0.036</b>             |
| 8 mammal X-Y pairs | 0.175                      | Remaining ancestral X         | <b>0.046</b>             |
| X escape           | 0.088                      | X-inactivated                 | <b>&lt; 0.001</b>        |

718

719 **Figure 2 – Figure Supplement 2: Resampling tests controlling for differences in**

720 **haploinsufficiency probability between X-linked genes.** In each row, genes from the

721 “background” set (indicated in the third column) were matched to genes in the “foreground” set

722 (first column) by their predicted haploinsufficiency probability. The mean P<sub>CT</sub> score of the

723 foreground set was compared to the distribution of mean P<sub>CT</sub> scores from the matched

724 background set to obtain a one-sided empirical p-value.

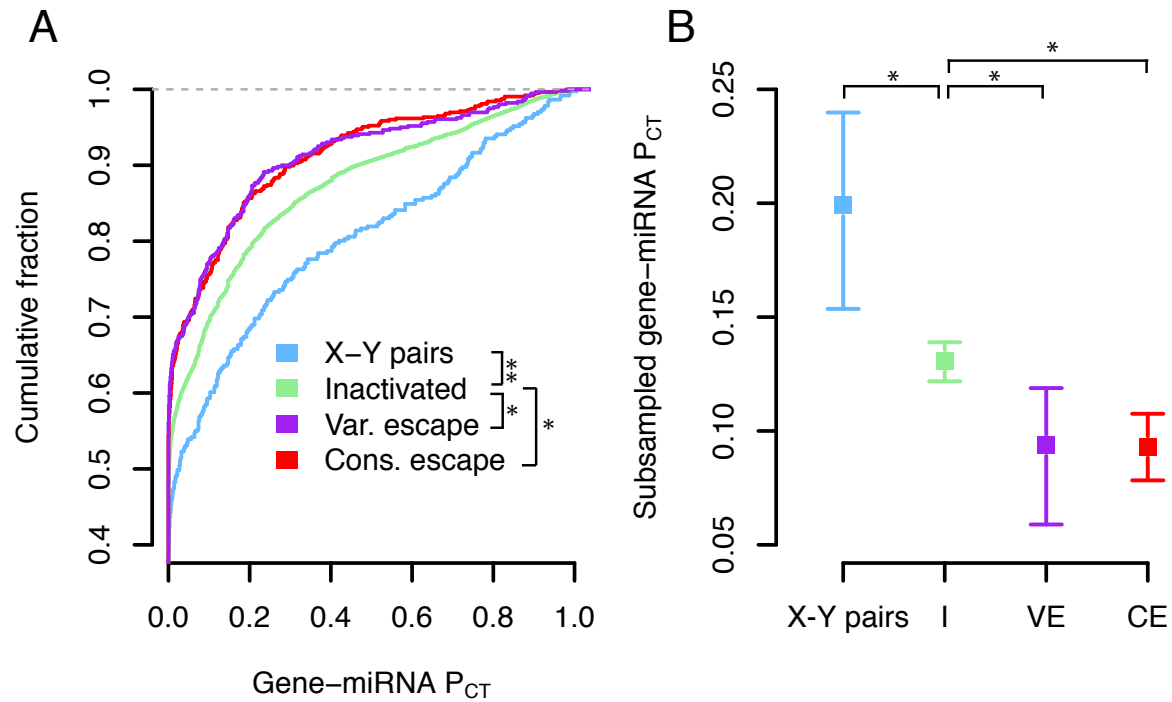

725

726 **Figure 2 – Figure Supplement 3:  $P_{CT}$  score comparisons with consistent and variable**

727 **escape genes separated.** (A)  $P_{CT}$  score distributions of all gene-miRNA interactions involving

728 X-Y pairs ( $n = 371$  interactions from 16 genes), X-inactivated genes ( $n = 6743$  interactions from

729 329 genes), consistent escape genes ( $n = 567$  interactions from 30 genes), or variable escape

730 genes ( $n = 470$  interactions from 26 genes) as defined by Balaton et al (Balaton et al., 2015). \*  $p$

731  $< 0.05$ , \*\*  $p < 0.01$ , two-sided Kolmogorov-Smirnov test. (B) Resampled gene-miRNA  $P_{CT}$

732 scores of gene classes from (A). Points and error bars represent the median and 95% confidence

733 intervals from 1,000 gene samplings with replacement. \*  $p < 0.05$ , empirical  $p$ -value computed

734 as the fraction of random non-overlapping gene sets with a median difference in  $P_{CT}$  score at

735 least as large as the true difference.

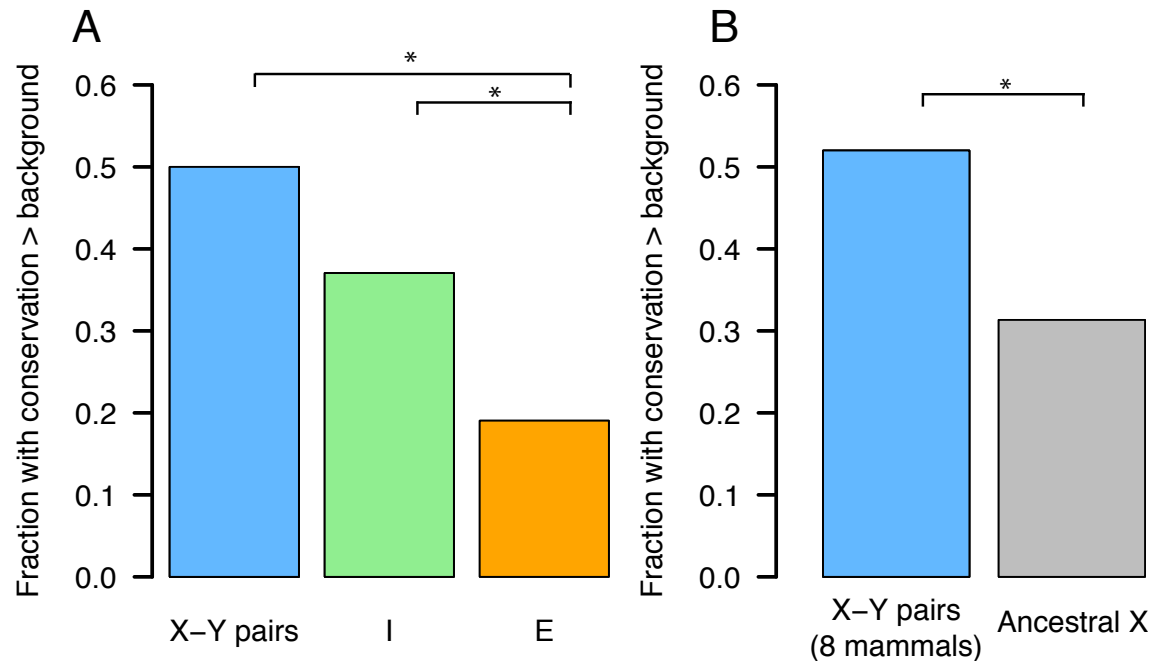

736

737 **Figure 3 – Figure Supplement 1: X-linked conservation of ancestral miRNA targeting**

738 **above background levels.** The fraction of genes in each class showing human-chicken miRNA

739 target site conservation above background was calculated by comparing the true number of

740 human-chicken-conserved target sites with the average number of human-chicken-conserved

741 sites using six shuffled k-mers for each miRNA family. (A) Human X-Y pairs (n = 15 genes), X-

742 inactivated genes (n = 329 genes) and X escape genes (n = 56 genes). (B) X-Y pairs across eight

743 mammals (n = 32 genes), other ancestral X genes (n = 457 genes). \* p < 0.05, two-sided Fisher

744 exact test.

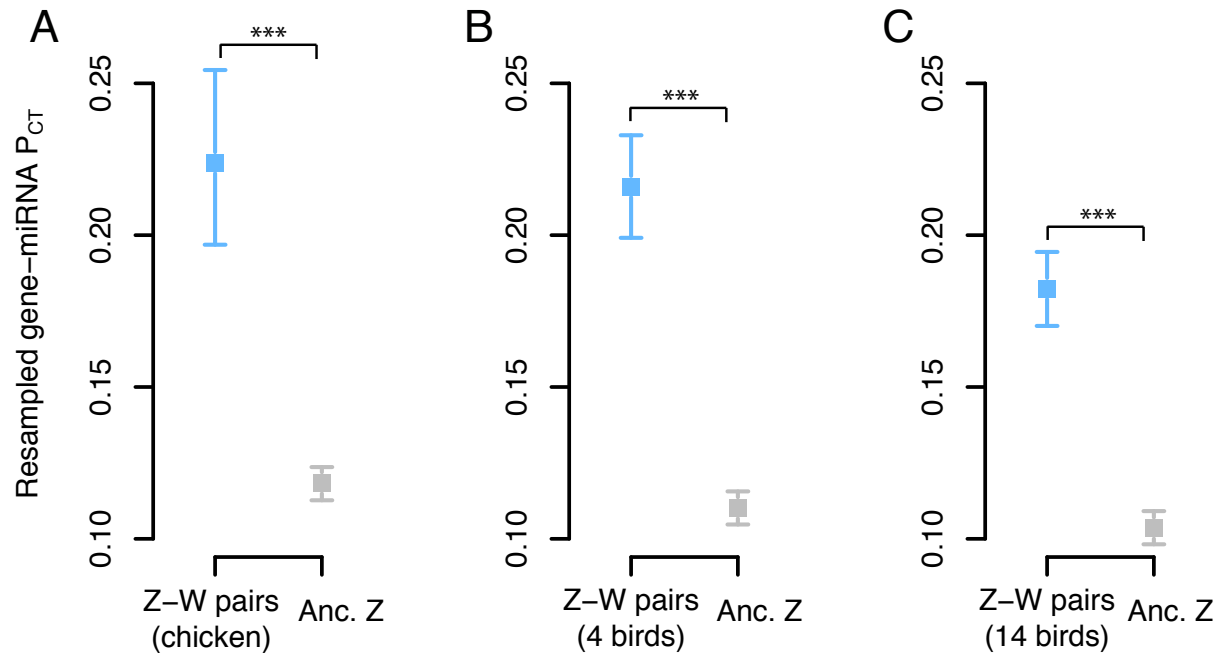

745

746 **Figure 4 – Figure Supplement 1: Resampled mean  $P_{CT}$  scores of Z-linked genes.** Gene sets:

747 (A) chicken Z-W pairs ( $n = 28$  genes) and other ancestral Z genes ( $n = 657$  genes), (B) Z-W pairs

748 across four birds ( $n = 78$  genes) compared to the remainder of ancestral Z genes ( $n = 607$  genes),

749 and (C) Z-W pairs across 14 birds ( $n = 157$  genes) compared to the remainder of ancestral Z

750 genes ( $n = 528$  genes). Points and error bars represent the median and 95% confidence intervals

751 from 1,000 gene samplings with replacement. \*\*\*  $p < 0.001$ , empirical p-value computed as the

752 fraction of random non-overlapping gene sets with a median difference in  $P_{CT}$  score at least as

753 large as the true difference.

| <b>Foreground</b> | <b>Mean P<sub>CT</sub></b> | <b>pHI-matched background</b> | <b>Empirical p-value</b> |
|-------------------|----------------------------|-------------------------------|--------------------------|
| Chicken Z-W pairs | 0.224                      | Remaining ancestral Z         | <b>0.001</b>             |
| 4 bird Z-W pairs  | 0.216                      | Remaining ancestral Z         | <b>&lt; 0.001</b>        |
| 14 bird Z-W pairs | 0.182                      | Remaining ancestral Z         | <b>&lt; 0.001</b>        |

754

755

**Figure 4 – Figure Supplement 2: Resampling tests controlling for differences in**

756

**haploinsufficiency probability between Z-linked genes.** In each row, genes from the

757

“background” set (indicated in the third column) were matched to genes in the “foreground” set

758

(first column) by their predicted haploinsufficiency probability. The mean P<sub>CT</sub> score of the

759

foreground set was compared to the distribution of mean P<sub>CT</sub> scores from the matched

760

background set to obtain a one-sided empirical p-value.

761

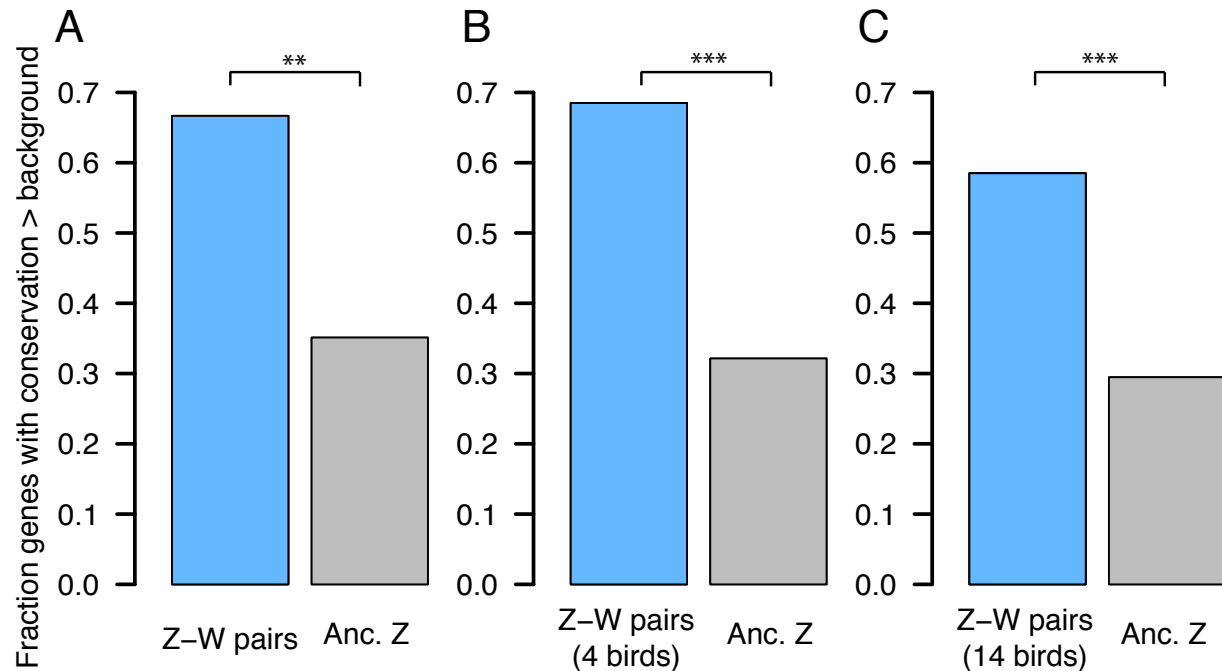

762

763 **Figure 5 – Figure Supplement 1: Z-linked conservation of ancestral miRNA targeting**

764 **above background levels.** The fraction of genes in each class showing human-chicken miRNA

765 target site conservation above background was calculated by comparing the true number of

766 human-chicken-conserved target sites with the average number of human-chicken-conserved

767 sites using six shuffled k-mers for each miRNA family. (A) chicken Z-W pairs (n = 28 genes)

768 and other ancestral Z genes (n = 657 genes), (B) Z-W pairs across four birds (n = 78 genes)

769 compared to the remainder of ancestral Z genes (n = 607 genes), and (C) Z-W pairs across 14

770 birds (n = 157 genes) compared to the remainder of ancestral Z genes (n = 528 genes). \*\* p <

771 0.01, \*\*\* p < 0.001, two-sided Fisher exact test.

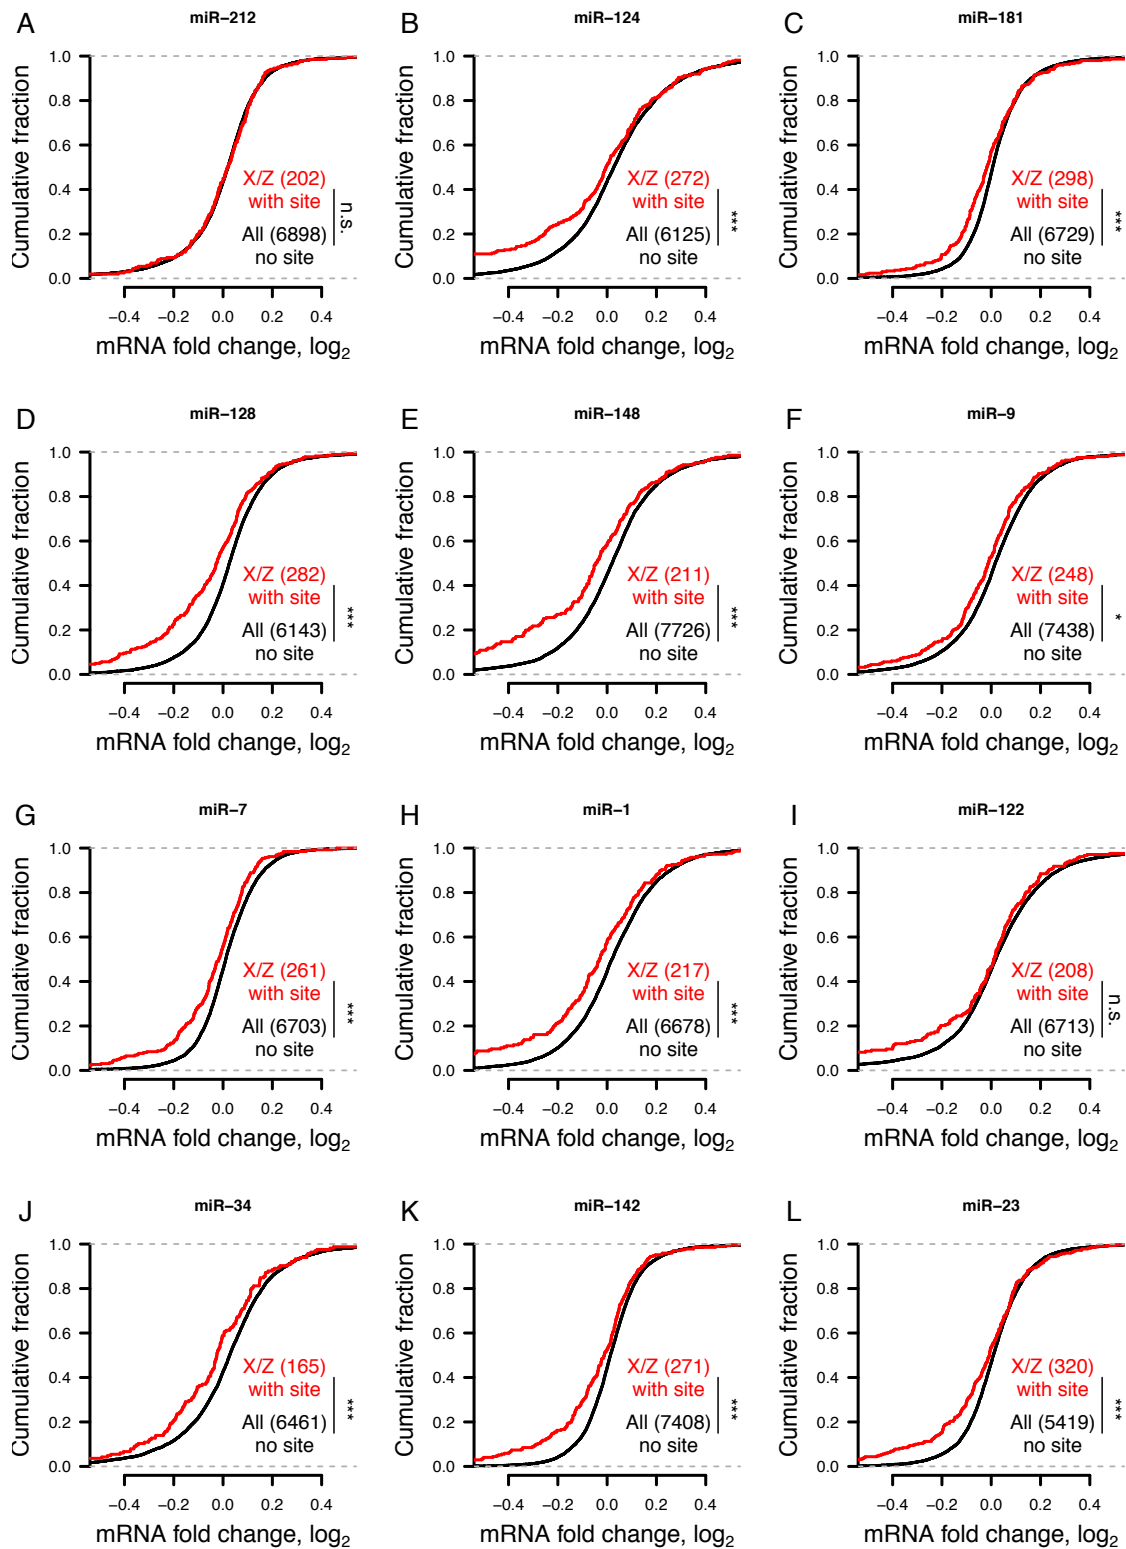

772

773 **Figure 6 – Figure Supplement 1: Gene expression changes following small RNA**  
774 **transfections in human HeLa cells. \*  $p < 0.05$ , \*\*\*  $p < 0.001$ , two-sided K-S test.**



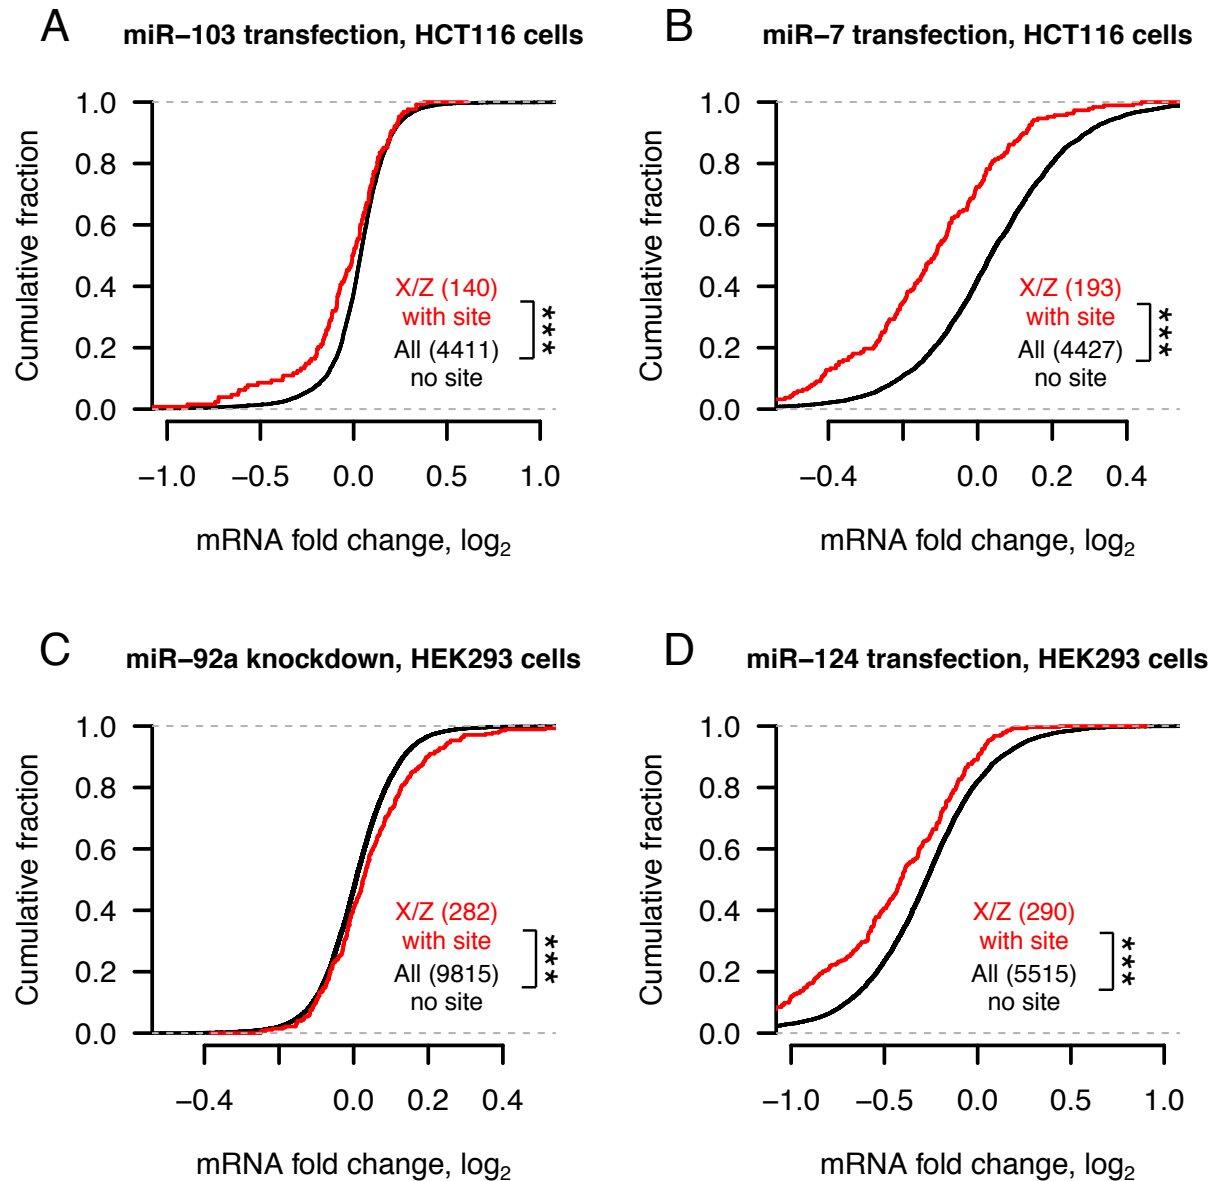

775

776 **Figure 6 – Figure Supplement 2: Gene expression changes following transfection or**  
777 **knockdown of additional miRNAs in human HCT116 or HEK293 cells. \*\*\*  $p < 0.001$ , two-**  
778 **side Kolmogorov-Smirnov test.**

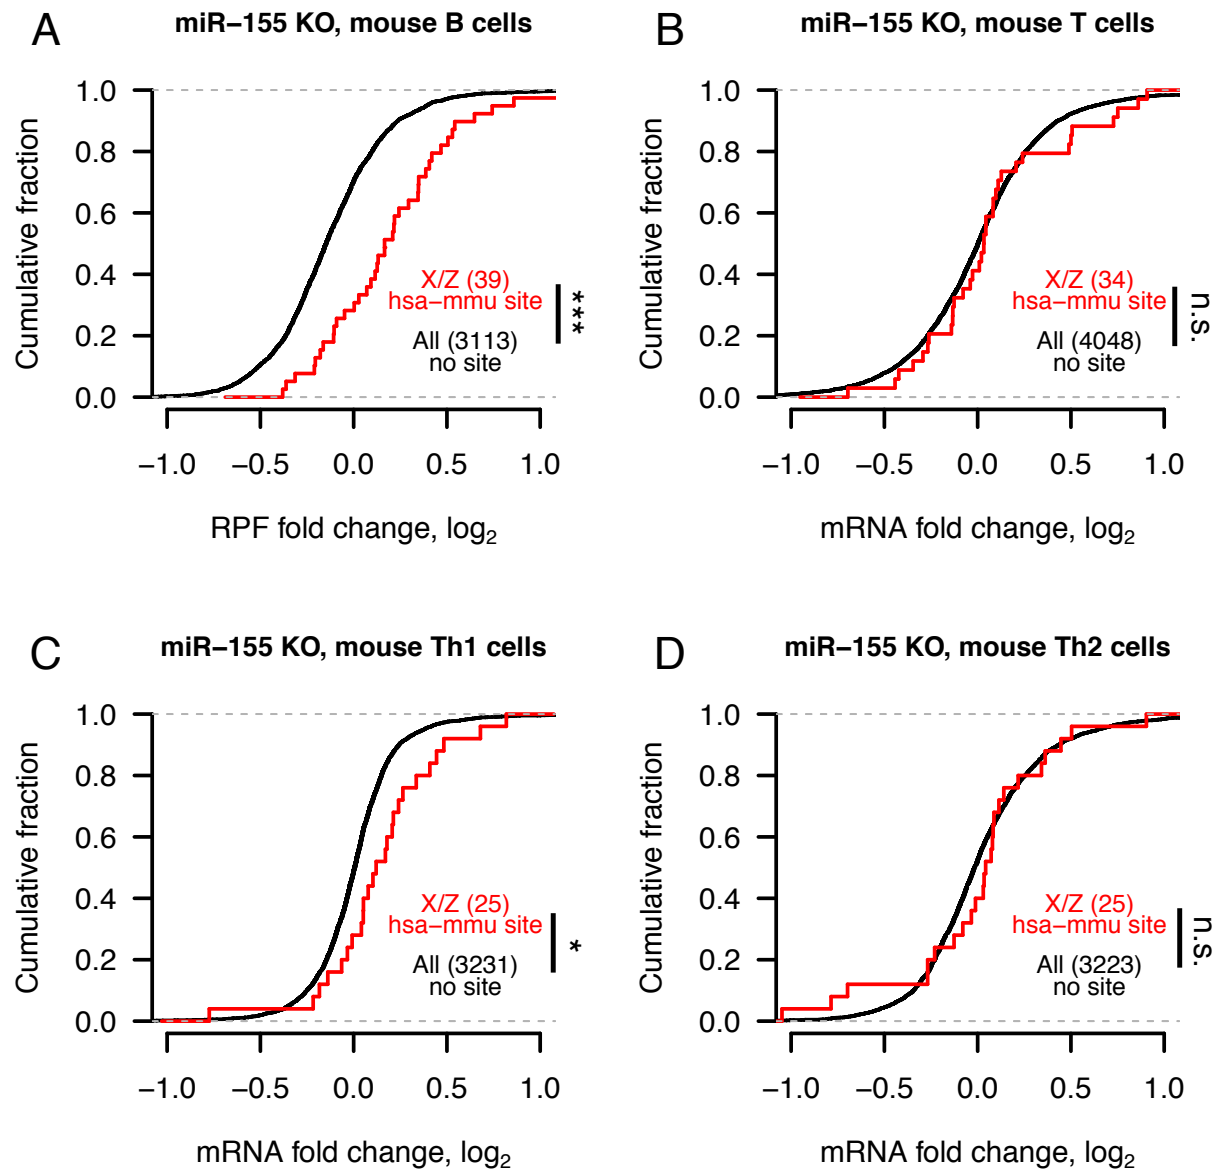

779

780 **Figure 6 – Figure Supplement 3: Changes in mRNA stability and translational efficiency**

781 **and gene expression following miR-155 knockout in mouse immune cells.** In each case,

782 mouse orthologs of X- or Z-linked genes containing a human-mouse-conserved (hsa-mmu) miR-

783 155 site were compared to human-mouse one-to-one orthologs lacking a miR-155 site. \*  $p < 0.05$ ,

784 \*\*\*  $p < 0.001$ , two-sided Kolmogorov-Smirnov test.

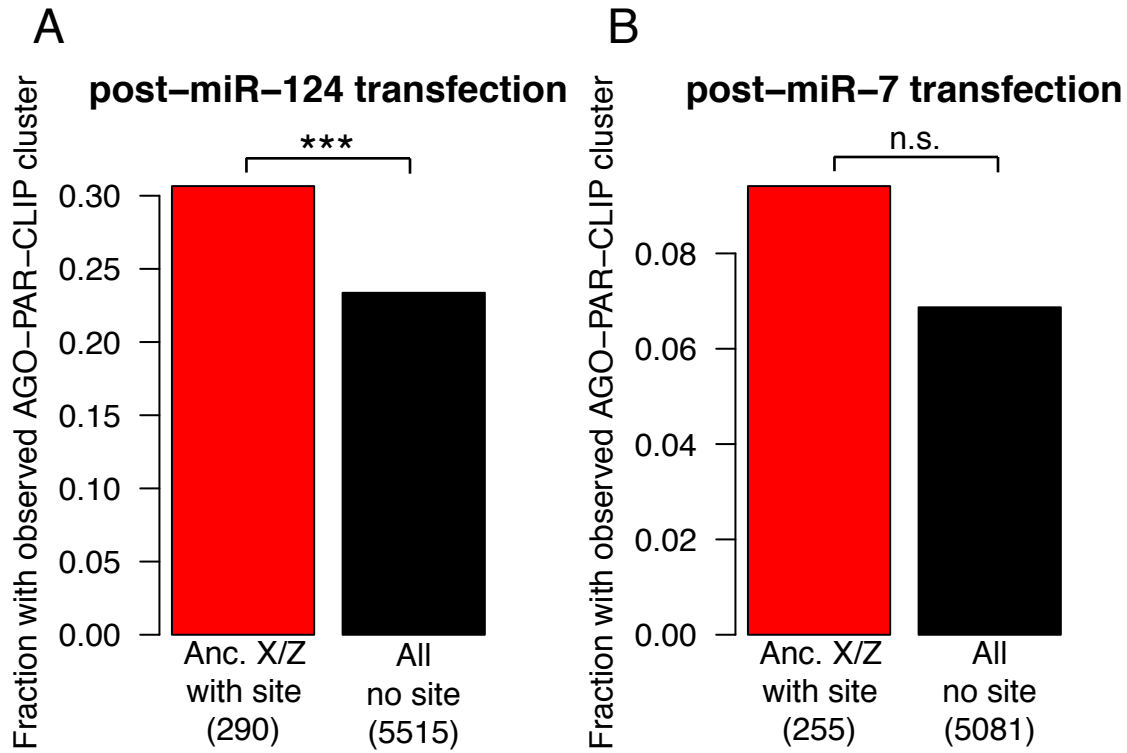

785

786 **Figure 6 – Figure Supplement 4: Argonaute binding measured by high-throughput**  
787 **crosslinking-immunoprecipitation (CLIP) following miRNA transfection in HEK293 cells.**

788 \*\*\*  $p < 0.001$ , two-sided Fisher's exact test.
